# Supplementary material for: Synthesis of compounds with C–P–P and CP–P bond systems based on the phospha-Wittig reaction
Source: Royal Society of Chemistry journal article supplement (doi:10.1039/d0dt02728f), 2020-01-01
Supplement: d0dt02728f1.pdf [file d0dt02728f1.pdf]

# **Synthesis of compounds with C-P-P and C=P-P bond systems based on the phospho-Wittig reaction**

*Aleksandra Ziółkowska, Natalia Szykiewicz, Jerzy Pikies, Łukasz Ponikiewski\**

Department of Inorganic Chemistry, Chemical Faculty, Gdansk University of Technology, 11/12 G.

Narutowicza Str., 80-233 Gdansk, Poland.

Titanium complexes, phosphanylphosphido ligand, phospho-Wittig reaction, coordination chemistry, X-ray analysis, DFT calculations, NMR spectroscopy analysis.

|                                                                                                                                                                                          |    |
|------------------------------------------------------------------------------------------------------------------------------------------------------------------------------------------|----|
| <b>PART A. NMR DATA</b> .....                                                                                                                                                            | 3  |
| 1. NMR spectra of reaction mixture after reaction of [ <sup>Me</sup> NacNacTi(Cl){η <sup>2</sup> -P(SiMe <sub>3</sub> )-PtBu <sub>2</sub> }] ( <b>1</b> ) with Ph <sub>2</sub> C=O. .... | 3  |
| 2. NMR spectra of reaction mixture after reaction of <b>1</b> with 9-fluorenone.....                                                                                                     | 4  |
| 3. NMR spectra of reaction mixture of reaction of <b>1</b> with (Ph)MeC=O and of isolated phosphanylphosphaalkene (Ph)MeC=P-PtBu <sub>2</sub> . ....                                     | 5  |
| 4. NMR spectra of dissolved complex <b>10</b> in THF and of isolated phosphanylphosphaalkene (CH <sub>2</sub> ) <sub>4</sub> C=P-PtBu <sub>2</sub> . ....                                | 11 |
| 5. NMR spectra of dissolved complex <b>11</b> in THF and of isolated phosphanylphosphaalkene (CH <sub>2</sub> ) <sub>5</sub> C=P-PtBu <sub>2</sub> . ....                                | 14 |
| 6. NMR spectra of reaction mixture of <b>1</b> with cycloheptanone. ....                                                                                                                 | 18 |
| 7. NMR spectra of isolated crystals of <b>3</b> . ....                                                                                                                                   | 19 |
| 8. <sup>31</sup> P{ <sup>1</sup> H}-NMR spectrum of reaction mixture of [ <sup>Me</sup> NacNacTi(Cl){η <sup>2</sup> -P-PtBu <sub>2</sub> }] ( <b>4</b> ) with 9-fluorenone. ....         | 23 |
| 9. <sup>31</sup> P{ <sup>1</sup> H}-NMR spectrum of reaction mixture of [ <sup>Me</sup> NacNacTi(Cl){η <sup>2</sup> -P-PtBu <sub>2</sub> }] ( <b>4</b> ) with acetophenone. ....         | 24 |
| <b>PART B. X-RAY CRYSTALLOGRAPHIC DATA</b> .....                                                                                                                                         | 25 |
| <b>Table S1.</b> Crystallographic data for <b>3</b> , <b>5</b> and <b>8</b> . ....                                                                                                       | 26 |
| <b>Table S2.</b> Crystallographic data for <b>10</b> , <b>11</b> and <b>11b</b> . ....                                                                                                   | 27 |
| <b>Table S3.</b> Crystallographic data for <b>12</b> . ....                                                                                                                              | 28 |
| Molecular structure of [ <sup>Me</sup> NacNacTi(Cl){OC(CH <sub>2</sub> ) <sub>4</sub> }CH(C=O)(CH <sub>2</sub> ) <sub>5</sub> ] ( <b>11b</b> ) .....                                     | 29 |
| Molecular structure of [ <sup>Me</sup> NacNacTi(Cl){OC(CH <sub>2</sub> ) <sub>5</sub> }CH(C=O)(CH <sub>2</sub> ) <sub>6</sub> ] ( <b>12</b> ).....                                       | 30 |
| <b>PART C. DFT CALCULATIONS DATA</b> .....                                                                                                                                               | 31 |
| <b>PART D. REFERENCES</b> .....                                                                                                                                                          | 44 |

## PART A. NMR DATA

1. NMR spectra of reaction mixture after reaction of [<sup>Me</sup>NacNacTi(Cl){η<sup>2</sup>-P(SiMe<sub>3</sub>)-PtBu<sub>2</sub>}] (**1**) with Ph<sub>2</sub>C=O.

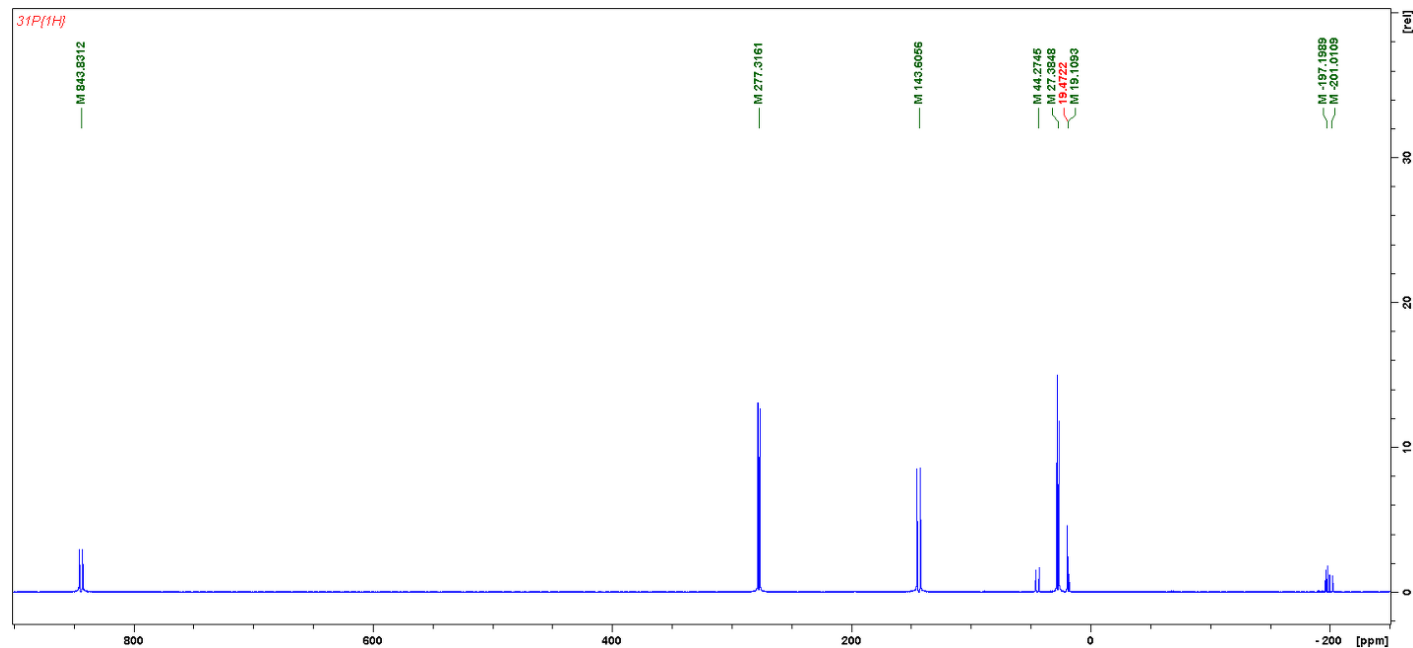

**Figure S1.** <sup>31</sup>P{<sup>1</sup>H}-NMR spectrum of reaction mixture after reaction of [<sup>Me</sup>NacNacTi(Cl){η<sup>2</sup>-P(SiMe<sub>3</sub>)-PtBu<sub>2</sub>}] (**1**) with Ph<sub>2</sub>C=O.

- 843.83 ppm, (d),  $J_{PP} = 450.5$  Hz, [<sup>Me</sup>NacNacTi(Cl)(η<sup>2</sup>-P-PtBu<sub>2</sub>)];
- 277.32 ppm, (d),  $J_{PP} = 232.5$  Hz, Ph<sub>2</sub>C=P-PtBu<sub>2</sub>;
- 143.60 ppm, (d),  $J_{PP} = 450.5$  Hz, [<sup>Me</sup>NacNacTi(Cl)(η<sup>2</sup>-P-PtBu<sub>2</sub>)];
- 44.27 ppm, (d),  $J_{PP} = 399.6$  Hz, *t*Bu<sub>2</sub>P-P(SiMe<sub>3</sub>)<sub>2</sub>;
- 27.38 ppm, (d),  $J_{PP} = 232.5$  Hz, Ph<sub>2</sub>C=P-PtBu<sub>2</sub>;
- 19.47 ppm, (s), *t*Bu<sub>2</sub>PH;
- 19.11 ppm, (d),  $J_{PP} = 196.2$  Hz, *t*Bu<sub>2</sub>P-P(SiMe<sub>3</sub>)H;
- -197.20 ppm, (d),  $J_{PP} = 196.2$  Hz, *t*Bu<sub>2</sub>P-P(SiMe<sub>3</sub>)H;
- -201.01 ppm, (d),  $J_{PP} = 399.6$  Hz, *t*Bu<sub>2</sub>P-P(SiMe<sub>3</sub>)<sub>2</sub>;

2. NMR spectra of reaction mixture after reaction of **1** with 9-fluorenone.

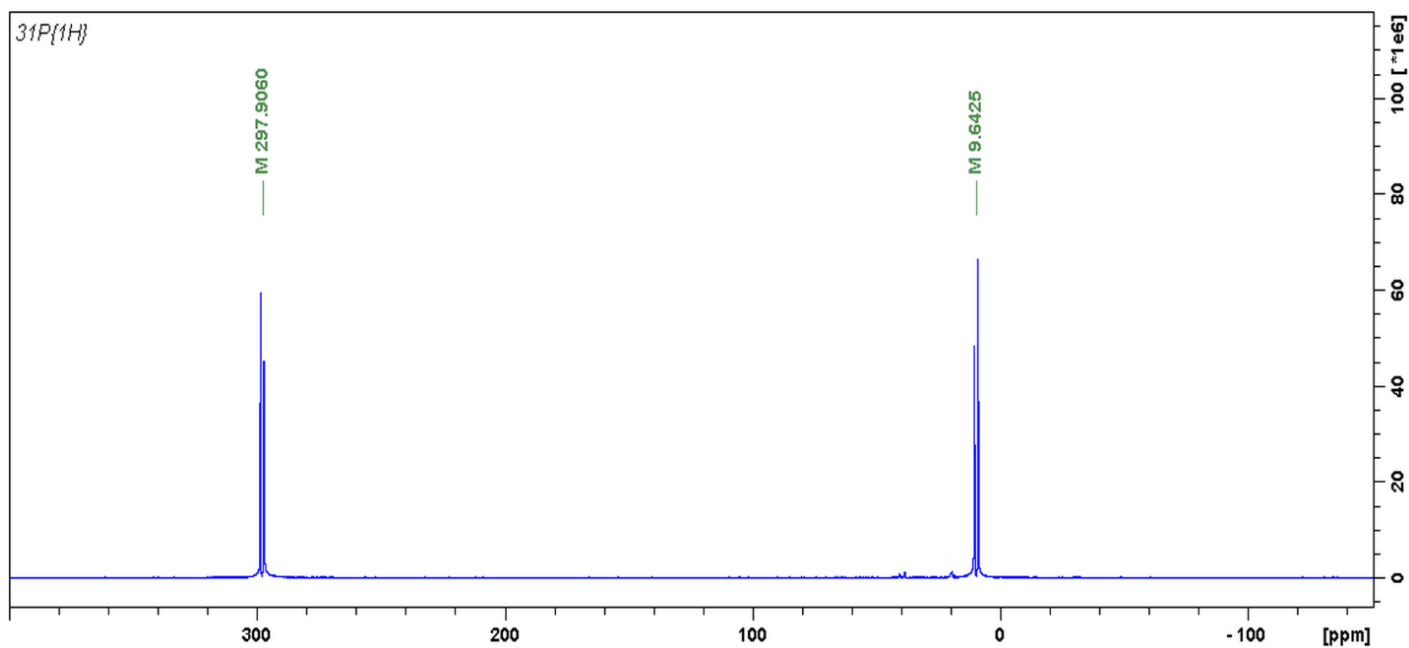

**Figure S2.**  $^{31}\text{P}\{^1\text{H}\}$ -NMR spectrum of reaction mixture after reaction of **1** with 9-fluorenone.

- 297.91 ppm, (d),  $J_{\text{PP}} = 232.5$  Hz, (fluorenyl)C=P-P*t*Bu<sub>2</sub>;
- 9.64 ppm, (d),  $J_{\text{PP}} = 232.5$  Hz, (fluorenyl)C=P-P*t*Bu<sub>2</sub>;

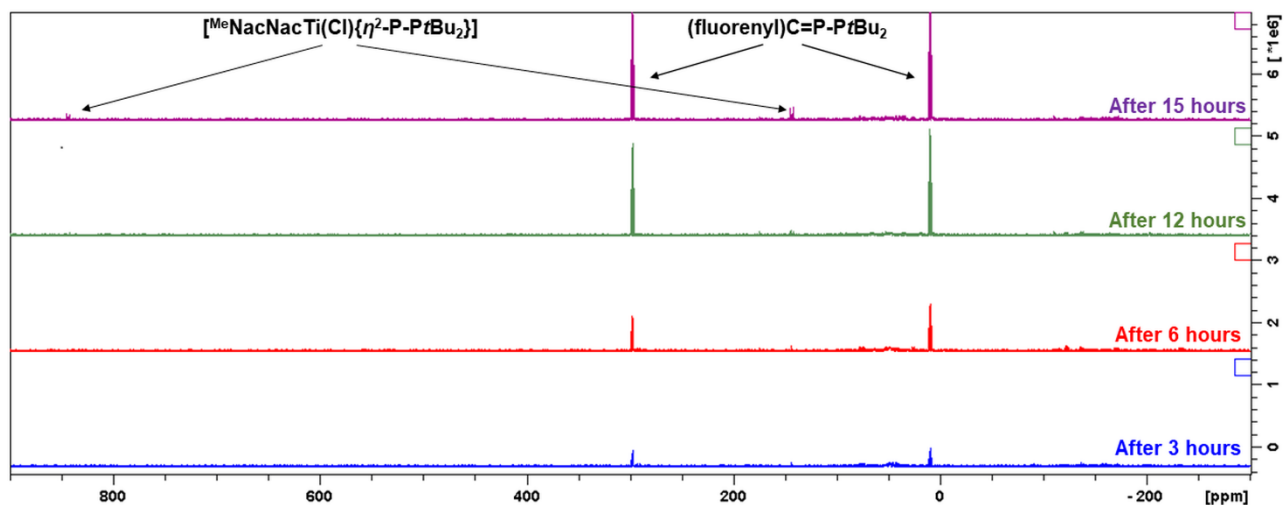

**Figure S3.**  $^{31}\text{P}\{^1\text{H}\}$ -NMR spectrum of reaction mixture after reaction of **1** with 9-fluorenone (molar ratio 1:1) measured after 3, 6, 12 and 15 hours.

3. NMR spectra of reaction mixture of reaction of **1** with (Ph)MeC=O and of isolated phosphanylphosphaalkene (Ph)MeC=P-PtBu<sub>2</sub>.

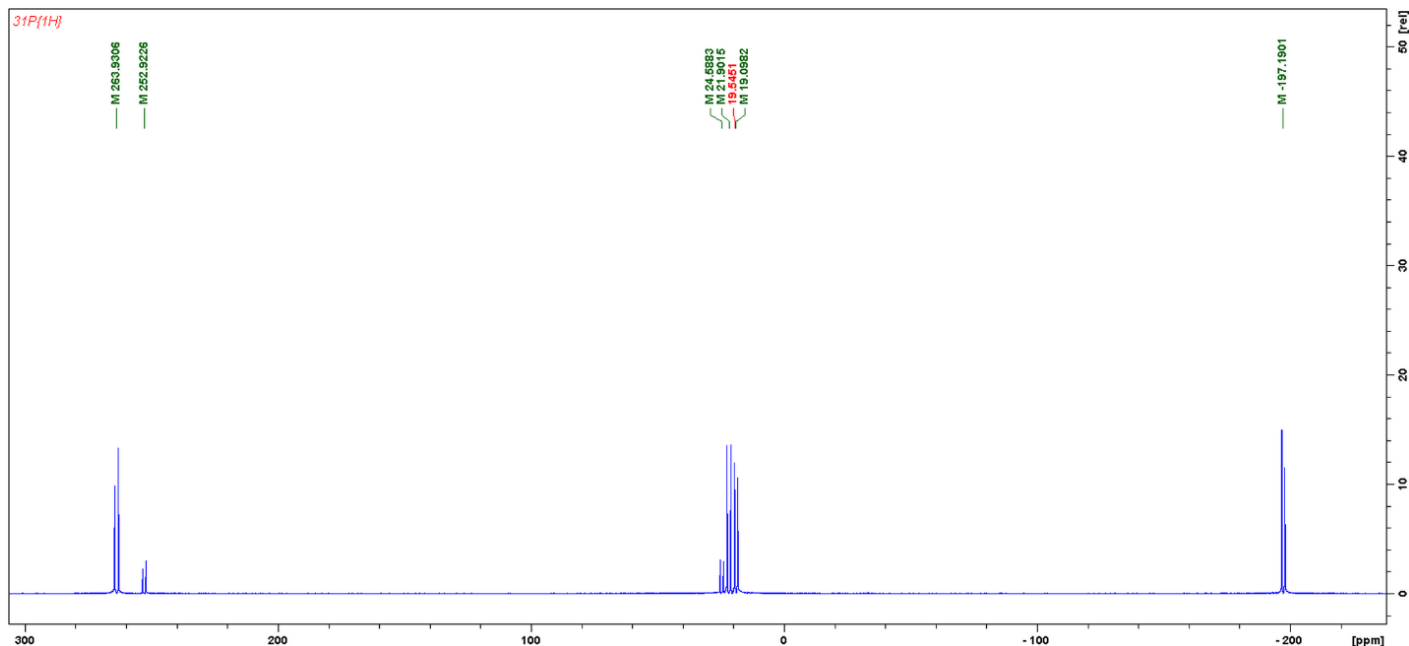

**Figure S4.** <sup>31</sup>P{<sup>1</sup>H}-NMR spectrum of the reaction mixture of **1** with acetophenone.

*E* - isomer:

- 263.93 ppm, (d),  $J_{PP} = 234.9$  Hz, (Ph)MeC=P-PtBu<sub>2</sub>;
- 21.90 ppm, (d),  $J_{PP} = 234.9$  Hz, (Ph)MeC=P-PtBu<sub>2</sub>;

*Z* - isomer:

- 252.92 ppm, (d),  $J_{PP} = 222.8$  Hz, (Ph)MeC=P-PtBu<sub>2</sub>;
- 24.59 ppm, (d),  $J_{PP} = 222.8$  Hz, (Ph)MeC=P-PtBu<sub>2</sub>;

Another signals:

- 19.54 ppm, s, tBu<sub>2</sub>PH;
- 19.09 ppm, d, 190.7 Hz, tBu<sub>2</sub>P-P(SiMe<sub>3</sub>)H;
- -197.19 ppm, d, 190.7 Hz, tBu<sub>2</sub>P-P(SiMe<sub>3</sub>)H;

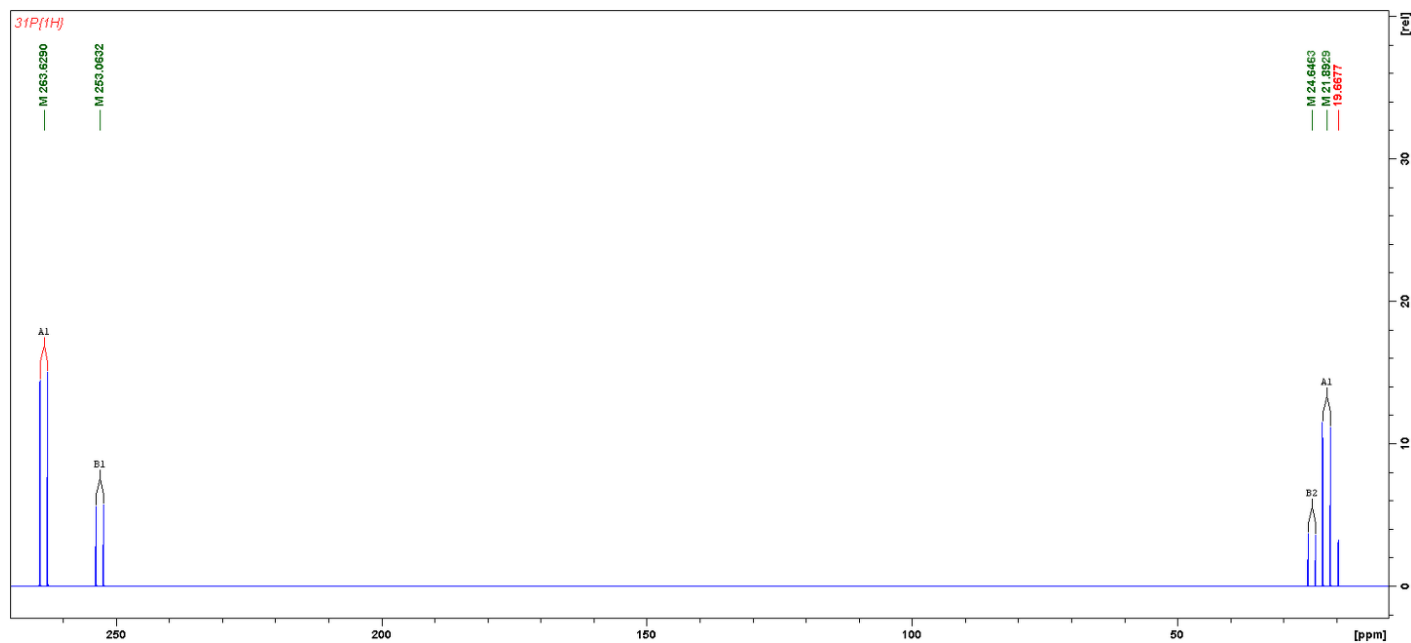

**Figure S5.**  $^{31}\text{P}\{^1\text{H}\}$ -NMR spectrum of isolated phosphanylphosphaalkene  $(\text{Ph})\text{MeC}=\text{P}-\text{P}t\text{Bu}_2$ .

*E* - isomer:

- 263.63 ppm, (d),  $J_{\text{PP}} = 234.9$  Hz,  $(\text{Ph})\text{MeC}=\text{P}-\text{P}t\text{Bu}_2$ ;
- 21.89 ppm, (d),  $J_{\text{PP}} = 234.9$  Hz,  $(\text{Ph})\text{MeC}=\text{P}-\text{P}t\text{Bu}_2$ ;

*Z* - isomer:

- 253.06 ppm, (d),  $J_{\text{PP}} = 222.8$  Hz,  $(\text{Ph})\text{MeC}=\text{P}-\text{P}t\text{Bu}_2$ ;
- 24.65 ppm, (d),  $J_{\text{PP}} = 222.8$  Hz,  $(\text{Ph})\text{MeC}=\text{P}-\text{P}t\text{Bu}_2$ ;

19.67 ppm, s,  $t\text{Bu}_2\text{PH}$ ;

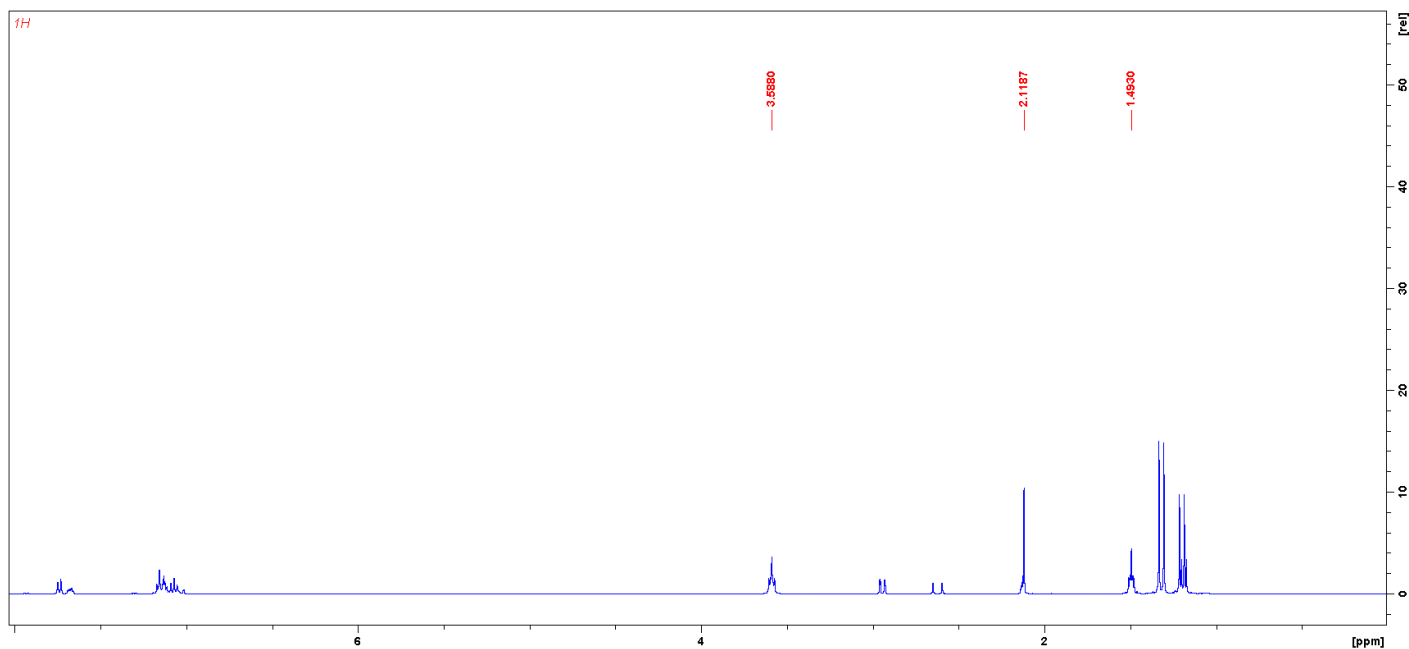

**Figure S6.**  $^1\text{H}$ -NMR spectrum of isolated phosphanylphosphaalkene  $(\text{Ph})\text{MeC}=\text{P}-\text{PtBu}_2$ .

- 3.59 ppm and 1.45 ppm, pent., protons of THF;
- 2.12 ppm,  $\text{tol-d}_8$  protons;
- From 8.00 ppm to 7.00 ppm, aromatic protons of phenyl groups from the phosphanylphosphaalkene isomers and toluene- $\text{d}_8$ ;

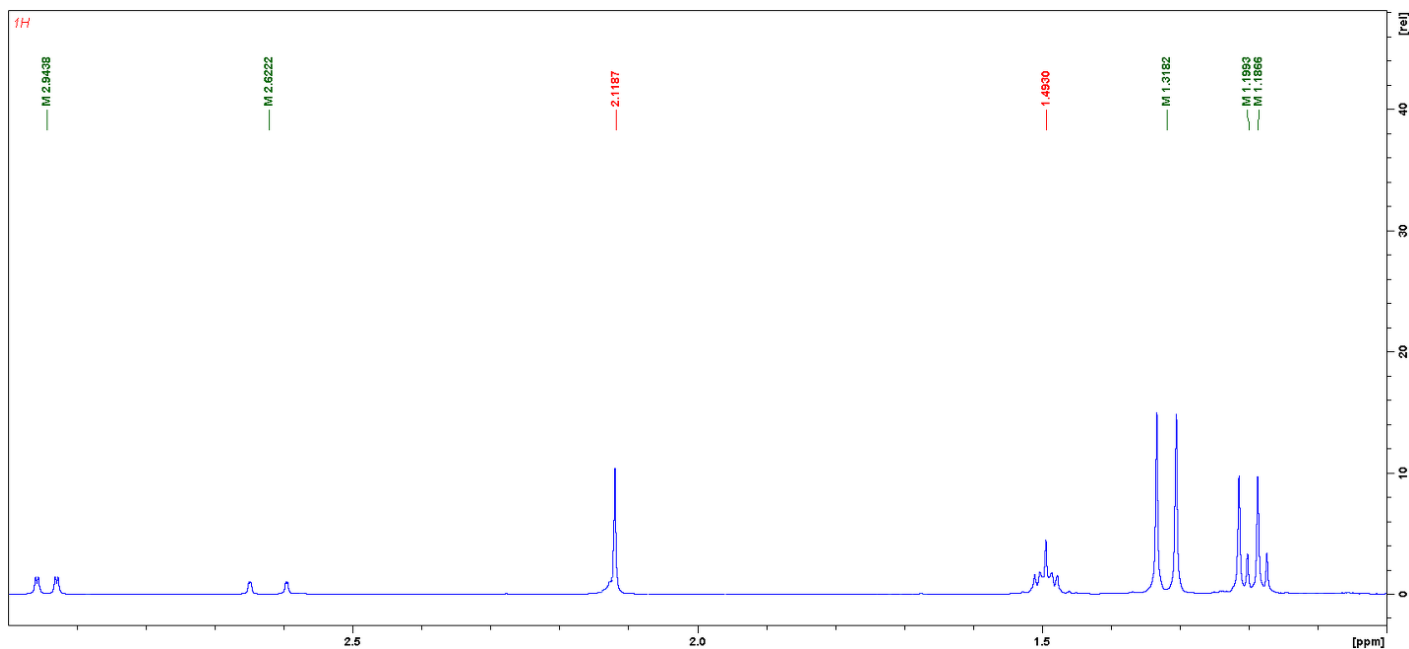

**Figure S7.**  $^1\text{H}$ -NMR spectrum of isolated phosphanylphosphaalkene  $(\text{Ph})\text{MeC}=\text{P}-\text{P}t\text{Bu}_2$  in the range from 3.00 ppm to 1.00 ppm.

*E* - isomer:

- 2.94 ppm, (dd),  $J_{\text{PH}} = 11.4$  Hz and  $J_{\text{PH}} = 1.6$  Hz,  $(\text{Ph})\text{MeC}=\text{P}-\text{P}t\text{Bu}_2$ ;
- 1.32 ppm, (d),  $J_{\text{PH}} = 11.4$  Hz,  $(\text{Ph})\text{MeC}=\text{P}-\text{P}t\text{Bu}_2$ ;

*Z* - isomer:

- 2.62 ppm, (dd),  $J_{\text{PH}} = 21.4$  Hz and  $J_{\text{PH}} = 0.9$  Hz,  $(\text{Ph})\text{MeC}=\text{P}-\text{P}t\text{Bu}_2$ ;
- 1.19 ppm, (d),  $J_{\text{PH}} = 10.9$  Hz,  $(\text{Ph})\text{MeC}=\text{P}-\text{P}t\text{Bu}_2$ ;

1.18 ppm, (d),  $J_{\text{PH}} = 11.1$  Hz,  $t\text{Bu}_2\text{PH}$ ;

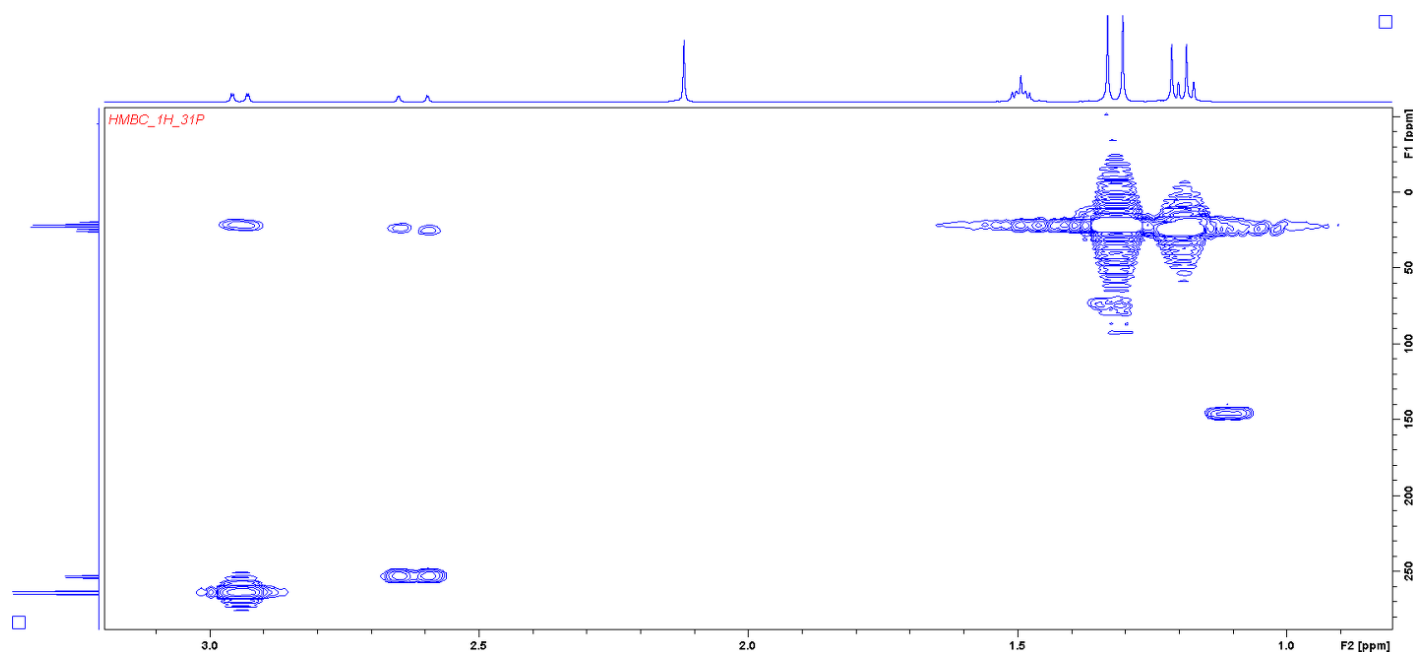

**Figure S8.**  $^1\text{H}/^{31}\text{P}$ -HMBC correlation spectrum of isolated phosphanylphosphaalkene  $(\text{Ph})\text{MeC}=\text{P}-\text{P}t\text{Bu}_2$ . Correlation between phosphorus atoms and *tert*-butyl and methyl groups.



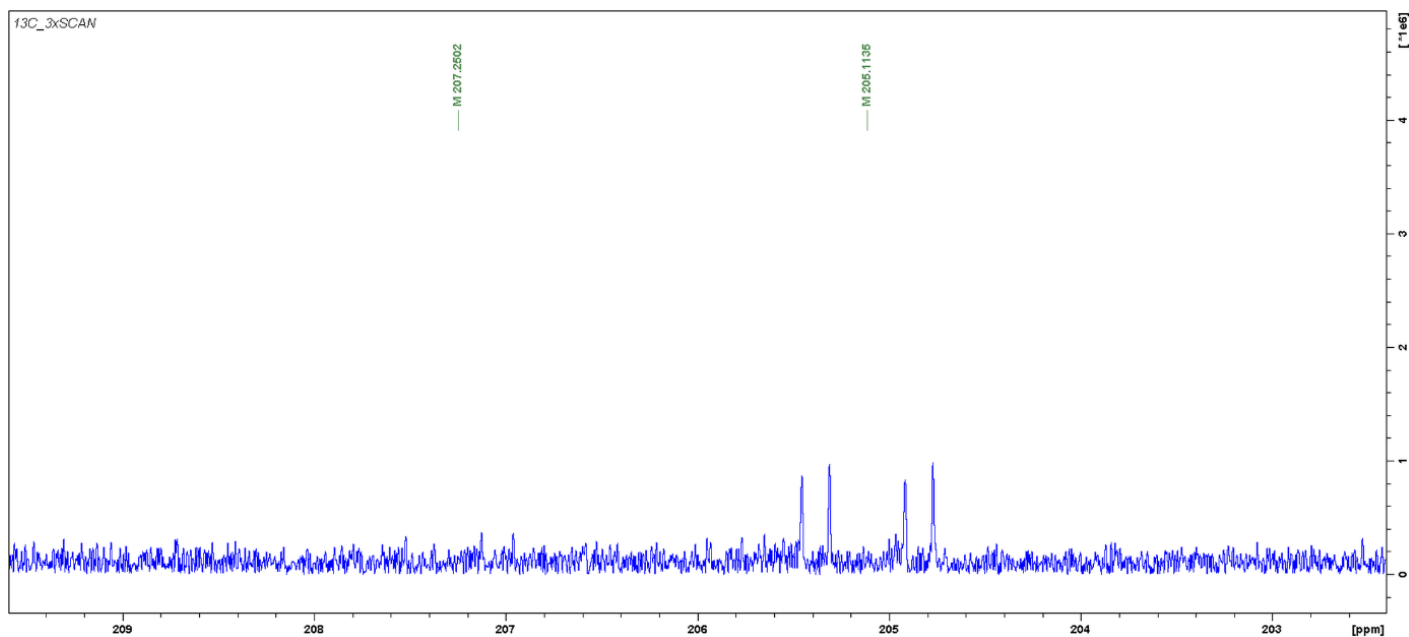

**Figure S9.**  $^{13}\text{C}\{^1\text{H}\}$ -NMR spectrum of isolated phosphanylphosphaalkene  $(\text{Ph})\text{MeC}=\text{P}-\text{PtBu}_2$  in the range from 210 ppm to 202 ppm.

*E* - isomer:

- 205.11 ppm, (dd),  $J_{\text{PC}} = 53.6$  Hz and  $J_{\text{PC}} = 14.53$  Hz,  $(\text{Ph})\text{MeC}=\text{P}-\text{PtBu}_2$ ;

*Z* - isomer:

- 207.25 ppm, (dd),  $J_{\text{PC}} = 39.7$  Hz and  $J_{\text{PC}} = 14.9$  Hz,  $(\text{Ph})\text{MeC}=\text{P}-\text{PtBu}_2$ ;

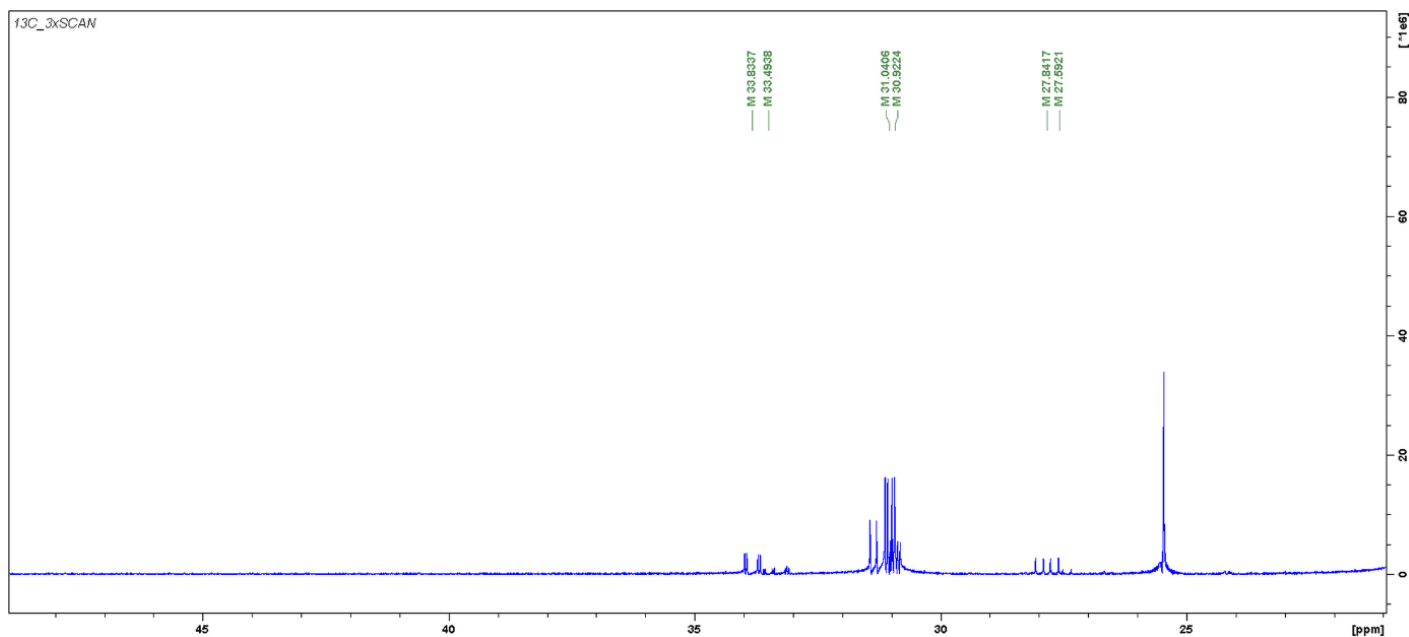

**Figure S10.**  $^{13}\text{C}\{^1\text{H}\}$ -NMR spectrum of isolated phosphanylphosphaalkene  $(\text{Ph})\text{MeC}=\text{P}-\text{PtBu}_2$  in the range from 50 ppm to 20 ppm.

*E* - isomer:

- 33.83 ppm, (dd),  $J_{\text{PC}} = 27.2$  Hz and  $J_{\text{PC}} = 4.2$  Hz,  $(\text{Ph})\text{MeC}=\text{P}-\text{PtBu}_2$ ;
- 31.04 ppm, (dd),  $J_{\text{PC}} = 13.6$  Hz and  $J_{\text{PC}} = 5.4$  Hz,  $(\text{Ph})\text{MeC}=\text{P}-\text{PtBu}_2$ ;
- 27.84 ppm, (dd),  $J_{\text{PC}} = 29.9$  Hz and  $J_{\text{PC}} = 16.3$  Hz,  $(\text{Ph})\text{MeC}=\text{P}-\text{PtBu}_2$ ;

*Z* - isomer:

- 33.49 ppm, (dd),  $J_{\text{PC}} = 17.6$  Hz and  $J_{\text{PC}} = 3.7$  Hz,  $(\text{Ph})\text{MeC}=\text{P}-\text{PtBu}_2$ ;
- 30.92 ppm, (dd),  $J_{\text{PC}} = 14.9$  Hz and  $J_{\text{PC}} = 5.4$  Hz,  $(\text{Ph})\text{MeC}=\text{P}-\text{PtBu}_2$ ;
- 27.59 ppm, (dd),  $J_{\text{PC}} = 27.4$  Hz and  $J_{\text{PC}} = 16.0$  Hz,  $(\text{Ph})\text{MeC}=\text{P}-\text{PtBu}_2$ ;

4. NMR spectra of dissolved complex **10** in THF and of isolated phosphanylphosphaalkene  $(\text{CH}_2)_4\text{C}=\text{P}-\text{PtBu}_2$ .

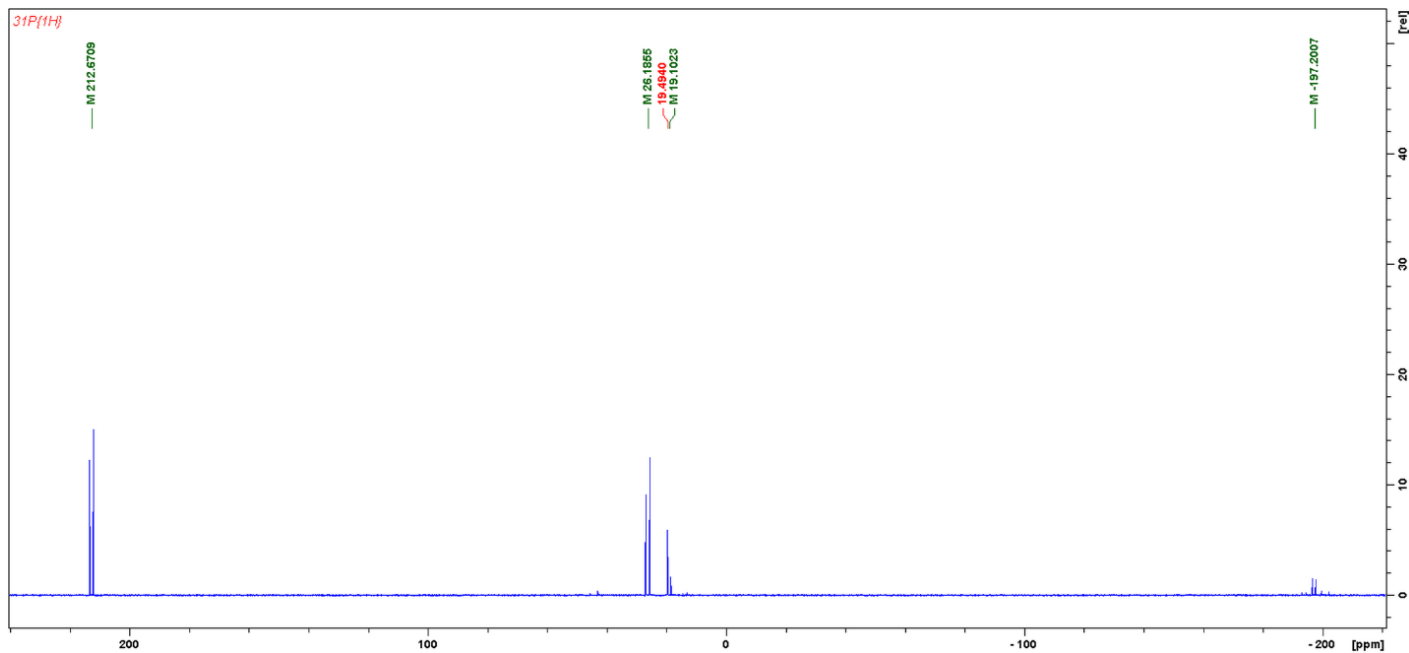

**Figure S11.**  $^{31}\text{P}\{^1\text{H}\}$ -NMR spectrum of dissolved complex **10** in THF.

- 212.67 ppm, (d),  $J_{\text{PP}} = 220.1$  Hz,  $(\text{CH}_2)_4\text{C}=\text{P}-\text{PtBu}_2$ ;
- 26.18 ppm, (d),  $J_{\text{PP}} = 220.1$  Hz,  $(\text{CH}_2)_4\text{C}=\text{P}-\text{PtBu}_2$ ;
- 19.49 ppm, (s),  $t\text{Bu}_2\text{PH}$ ;
- 19.10 ppm, (d),  $J_{\text{PP}} = 190.7$  Hz,  $t\text{Bu}_2\text{P}-\text{P}(\text{SiMe}_3)\text{H}$ ;
- 19.10 ppm, (d),  $J_{\text{PP}} = 190.7$  Hz,  $t\text{Bu}_2\text{P}-\text{P}(\text{SiMe}_3)\text{H}$ ;

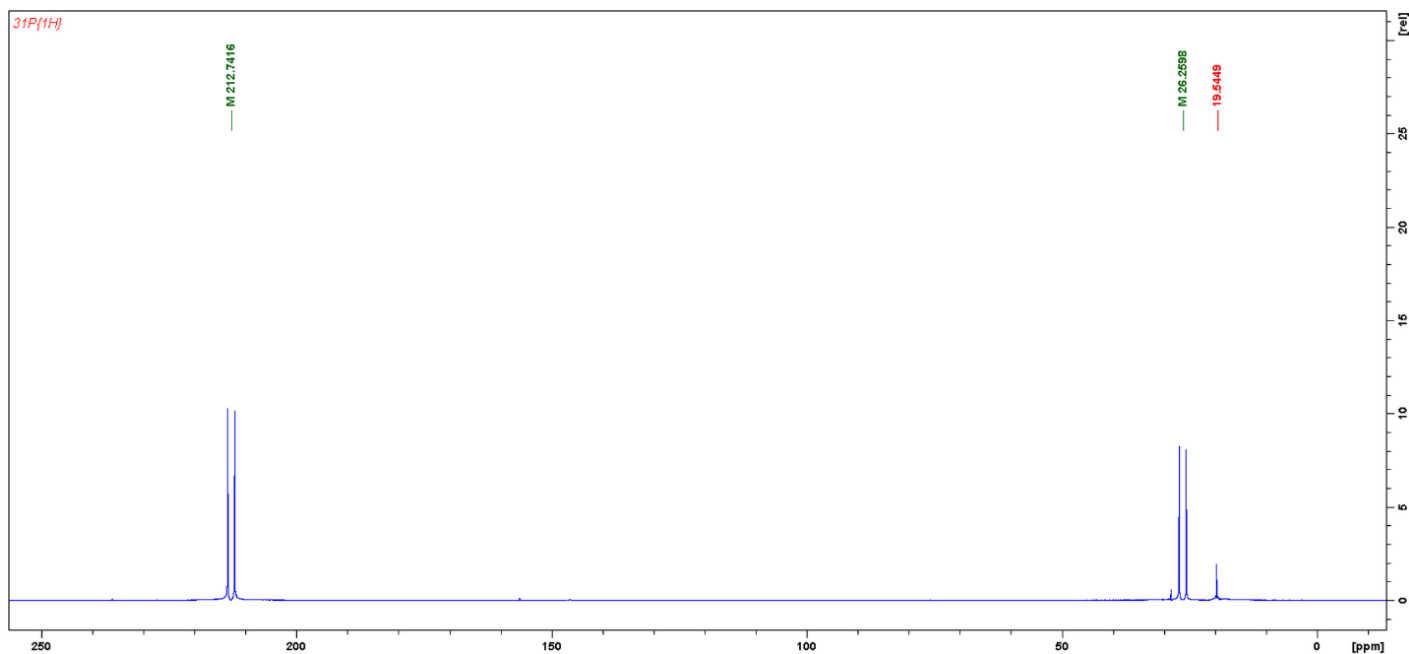

**Figure S12.** <sup>31</sup>P{<sup>1</sup>H}-NMR spectrum of isolated phosphanylphosphaalkene (CH<sub>2</sub>)<sub>4</sub>C=P-P*t*Bu<sub>2</sub>.

- 212.74 ppm, (d),  $J_{PP} = 220.1$  Hz, (CH<sub>2</sub>)<sub>4</sub>C=P-P*t*Bu<sub>2</sub>;
- 26.26 ppm, (d),  $J_{PP} = 220.1$  Hz, (CH<sub>2</sub>)<sub>4</sub>C=P-P*t*Bu<sub>2</sub>;
- 19.54 ppm, (s), *t*Bu<sub>2</sub>PH;

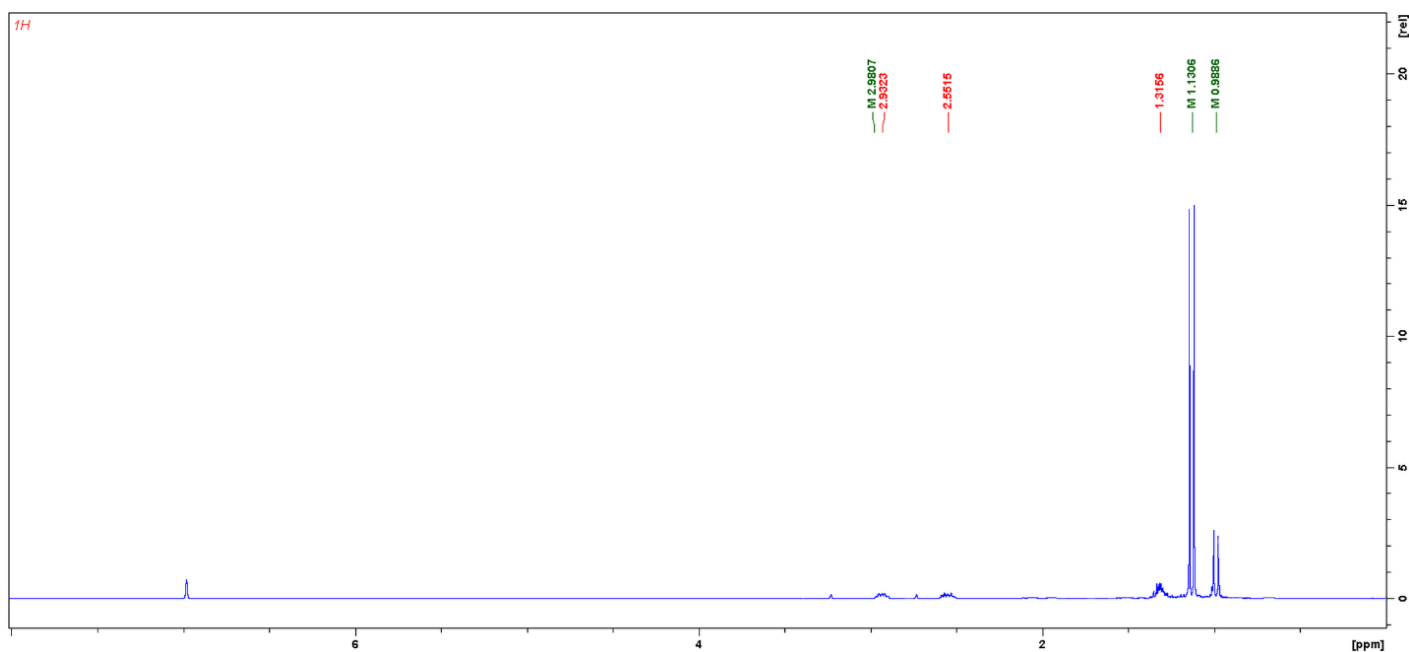

**Figure S13.** <sup>1</sup>H-NMR spectrum of isolated phosphanylphosphaalkene (CH<sub>2</sub>)<sub>4</sub>C=P-P*t*Bu<sub>2</sub>.

- 2.98 ppm, (d),  $J_{PH} = 198.2$  Hz, *t*Bu<sub>2</sub>PH;
- 2.93 ppm, (br. m.), (CH<sub>2</sub>)<sub>4</sub>C=P-P*t*Bu<sub>2</sub>;
- 2.55 ppm, (br. m.), (CH<sub>2</sub>)<sub>4</sub>C=P-P*t*Bu<sub>2</sub>;
- 1.31 ppm, (br. m.), (CH<sub>2</sub>)<sub>4</sub>C=P-P*t*Bu<sub>2</sub>;
- 1.13 ppm, (d),  $J_{PP} = 11.1$  Hz, (CH<sub>2</sub>)<sub>4</sub>C=P-P*t*Bu<sub>2</sub>;
- 0.99 ppm, (d),  $J_{PP} = 11.1$  Hz; *t*Bu<sub>2</sub>PH;

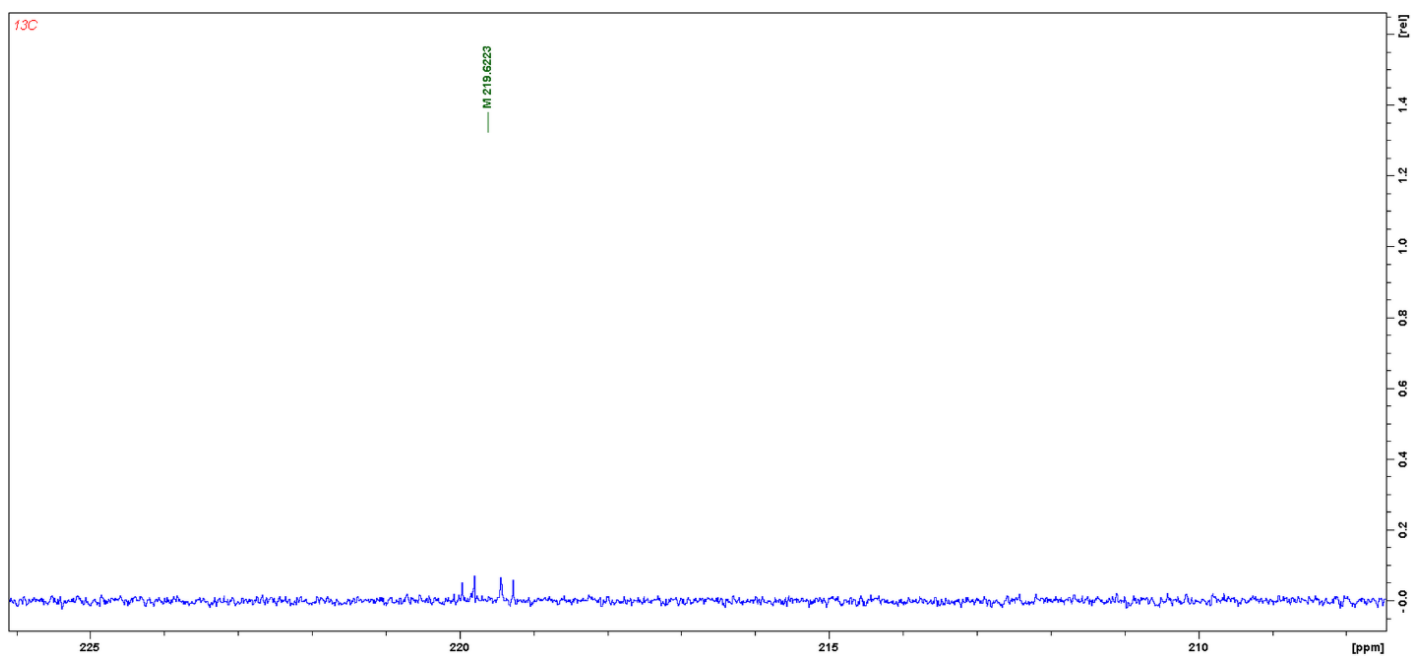

**Figure S14.**  $^{31}\text{C}\{^1\text{H}\}$ -NMR spectrum of isolated phosphanylphosphaalkene  $(\text{CH}_2)_4\text{C}=\text{P}-\text{P}t\text{Bu}_2$  in the range from 225 ppm to 210 ppm.

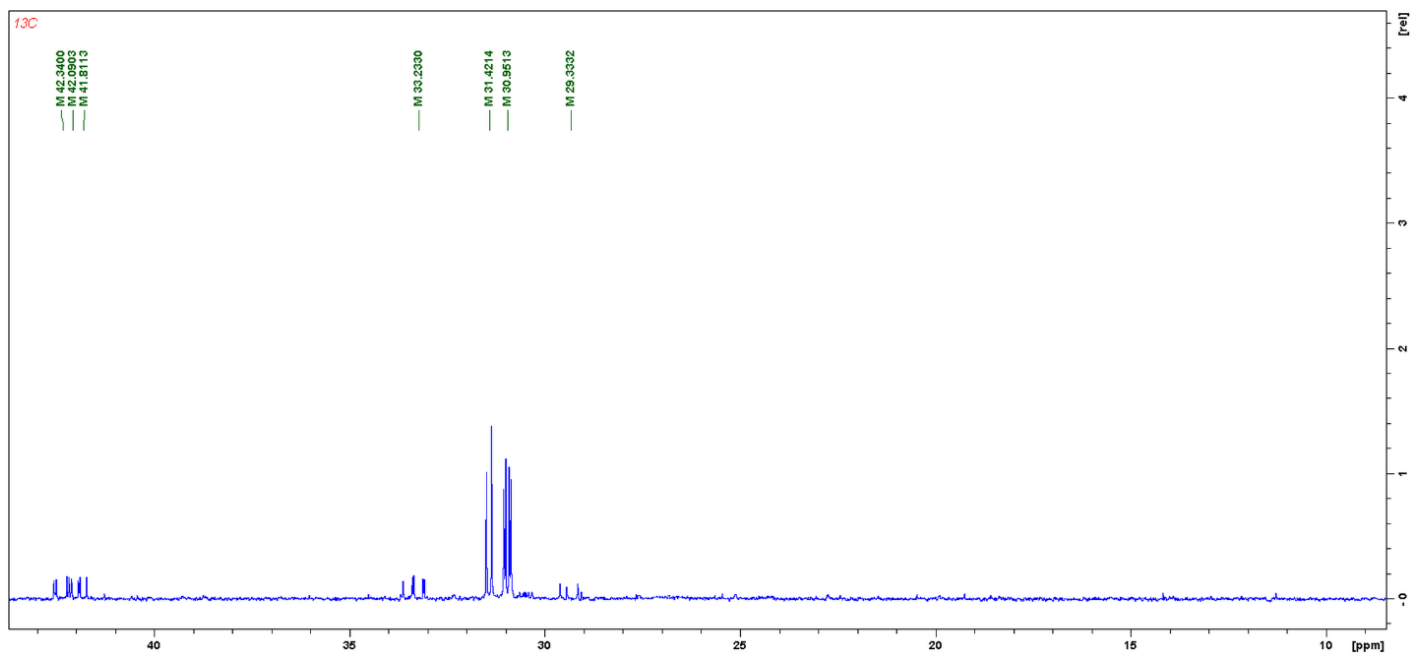

**Figure S15.**  $^{31}\text{C}\{^1\text{H}\}$ -NMR spectrum of isolated phosphanylphosphaalkene  $(\text{CH}_2)_4\text{C}=\text{P}-\text{P}t\text{Bu}_2$  in the range from 45 ppm to 10 ppm.

5. NMR spectra of dissolved complex **11** in THF and of isolated phosphanylphosphaalkene  $(\text{CH}_2)_5\text{C}=\text{P}-\text{PtBu}_2$ .

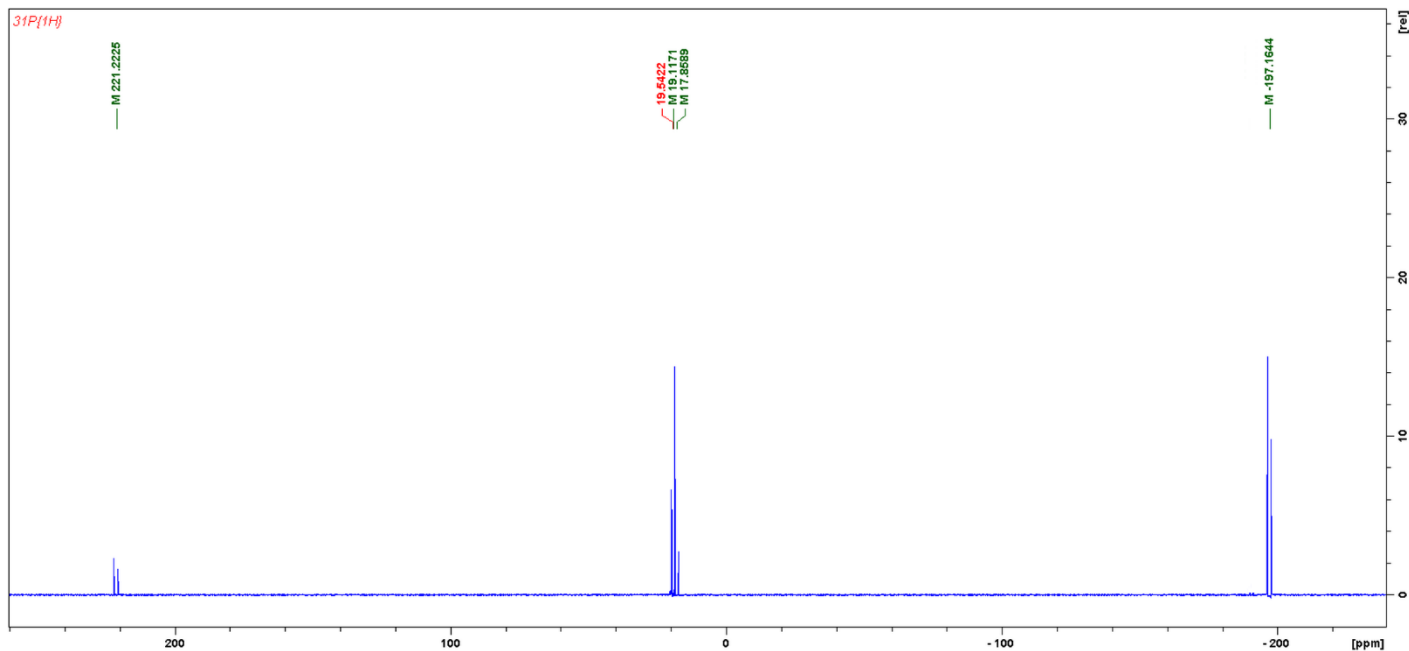

**Figure S16.**  $^{31}\text{P}\{^1\text{H}\}$ -NMR spectrum of dissolved complex **11** in THF.

- 221.22 ppm, (d),  $J_{\text{PP}} = 228.9$  Hz,  $(\text{CH}_2)_5\text{C}=\text{P}-\text{PtBu}_2$ .
- 19.54 ppm, (s),  $t\text{Bu}_2\text{PH}$ ;
- 19.11 ppm, (d),  $J_{\text{PP}} = 192.7$  Hz,  $t\text{Bu}_2\text{P}-\text{P}(\text{SiMe}_3)\text{H}$ .
- 17.86 ppm, (d),  $J_{\text{PP}} = 228.9$  Hz,  $(\text{CH}_2)_5\text{C}=\text{P}-\text{PtBu}_2$ .
- -197.16 ppm, (d),  $J_{\text{PP}} = 192.7$  Hz,  $t\text{Bu}_2\text{P}-\text{P}(\text{SiMe}_3)\text{H}$ .

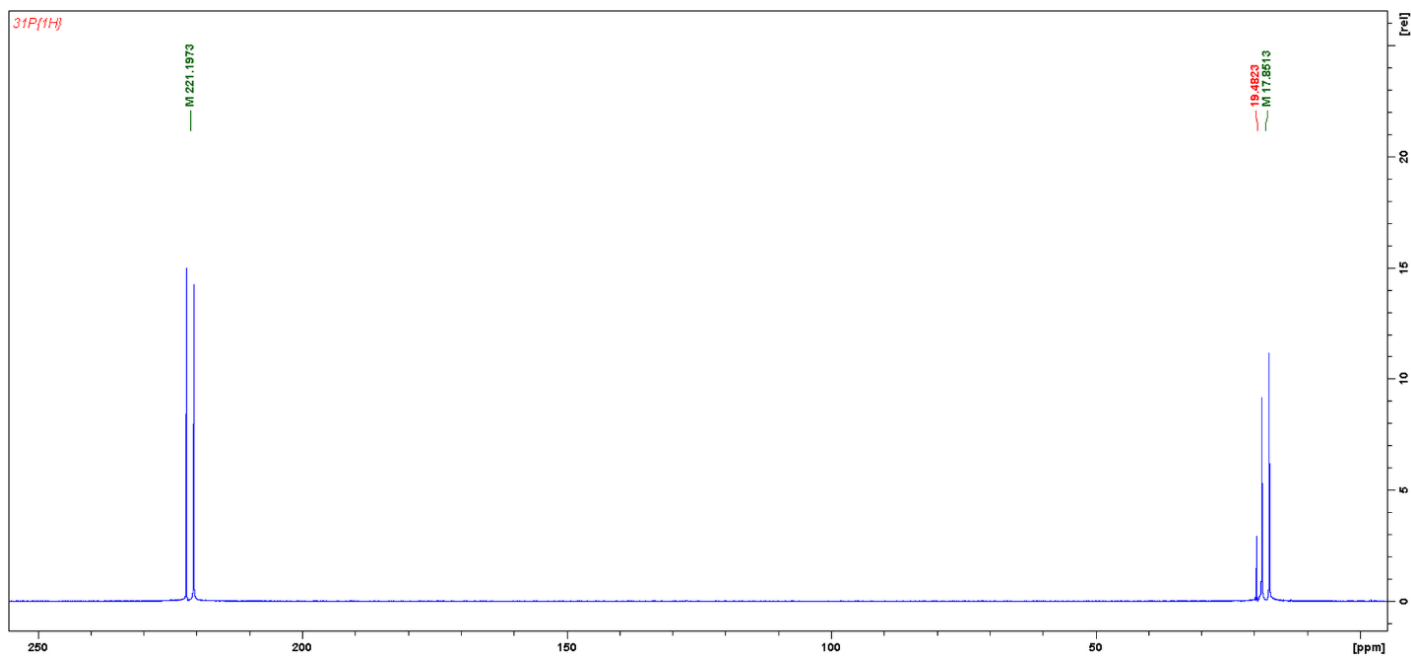

**Figure S17.**  $^{31}\text{P}\{^1\text{H}\}$ -NMR spectrum of the isolated phosphanylphosphaalkene  $(\text{CH}_2)_5\text{C}=\text{P}-\text{P}t\text{Bu}_2$ .

- 221.19 ppm, (d),  $J_{\text{PP}} = 228.9$  Hz,  $(\text{CH}_2)_5\text{C}=\text{P}-\text{P}t\text{Bu}_2$ ;
- 19.48 ppm, (s),  $t\text{Bu}_2\text{PH}$ ;
- 17.85 ppm, (d),  $J_{\text{PP}} = 228.9$  Hz,  $(\text{CH}_2)_5\text{C}=\text{P}-\text{P}t\text{Bu}_2$ ;

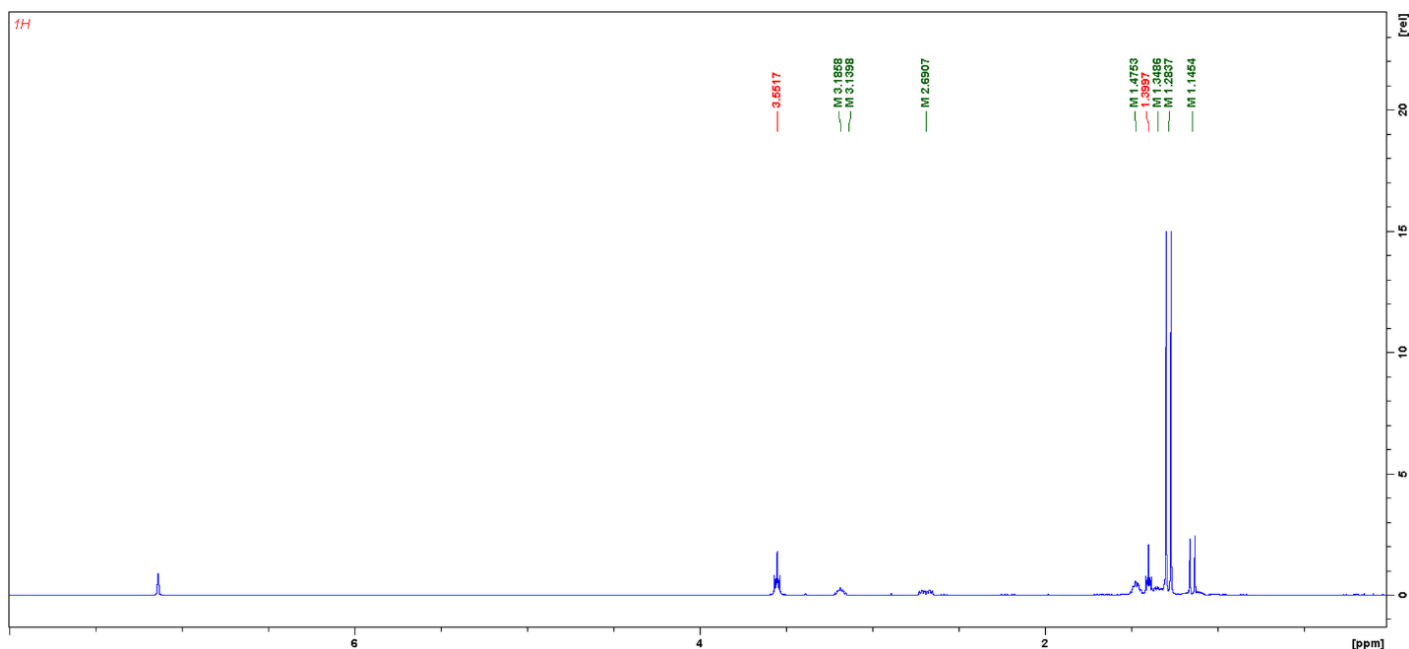

**Figure S18.**  $^1\text{H}$ -NMR spectrum of the isolated phosphanylphosphaalkene  $(\text{CH}_2)_5\text{C}=\text{P}-\text{P}t\text{Bu}_2$ .

- 3.55 ppm, (m), THF protons;
- 3.18 ppm, (br. m.),  $(\text{CH}_2)_5\text{C}=\text{P}-\text{P}t\text{Bu}_2$ ;
- 3.14 ppm, (d),  $J_{\text{PH}} = 11.49$  Hz,  $t\text{Bu}_2\text{PH}$ ;
- 2.69 ppm, (br. m.),  $(\text{CH}_2)_5\text{C}=\text{P}-\text{P}t\text{Bu}_2$ ;
- 1.47 ppm, (br. m.),  $(\text{CH}_2)_5\text{C}=\text{P}-\text{P}t\text{Bu}_2$ ;
- 1.40 ppm, (m), THF protons;
- 1.35 ppm, (br. m.),  $(\text{CH}_2)_5\text{C}=\text{P}-\text{P}t\text{Bu}_2$ ;
- 1.28 ppm, (d),  $J_{\text{PP}} = 11.2$  Hz,  $(\text{CH}_2)_5\text{C}=\text{P}-\text{P}t\text{Bu}_2$ ;
- 1.14 ppm, (d),  $J_{\text{PP}} = 11.5$  Hz,  $t\text{Bu}_2\text{PH}$ ;

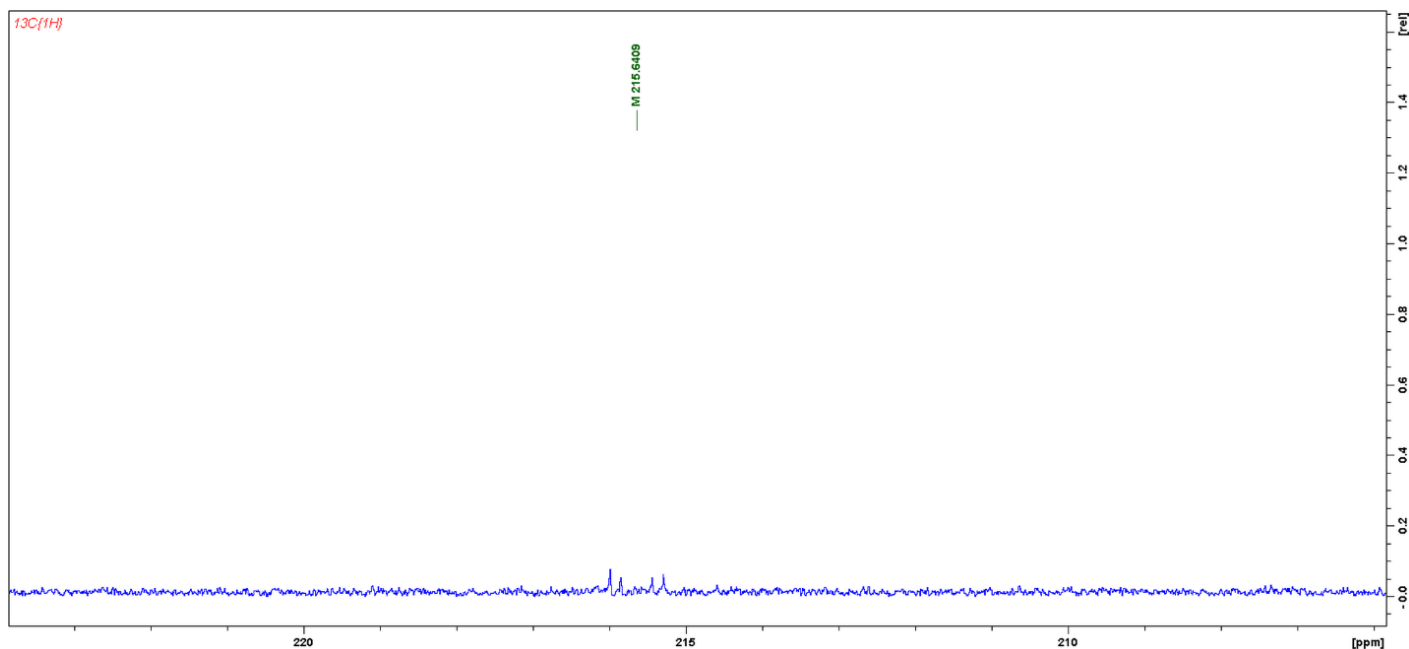

**Figure S19.**  $^{13}\text{C}\{^1\text{H}\}$ -NMR spectrum of isolated phosphanylphosphaalkene  $(\text{CH}_2)_5\text{C}=\text{P}-\text{P}t\text{Bu}_2$  in the range from 225 ppm to 205 ppm.



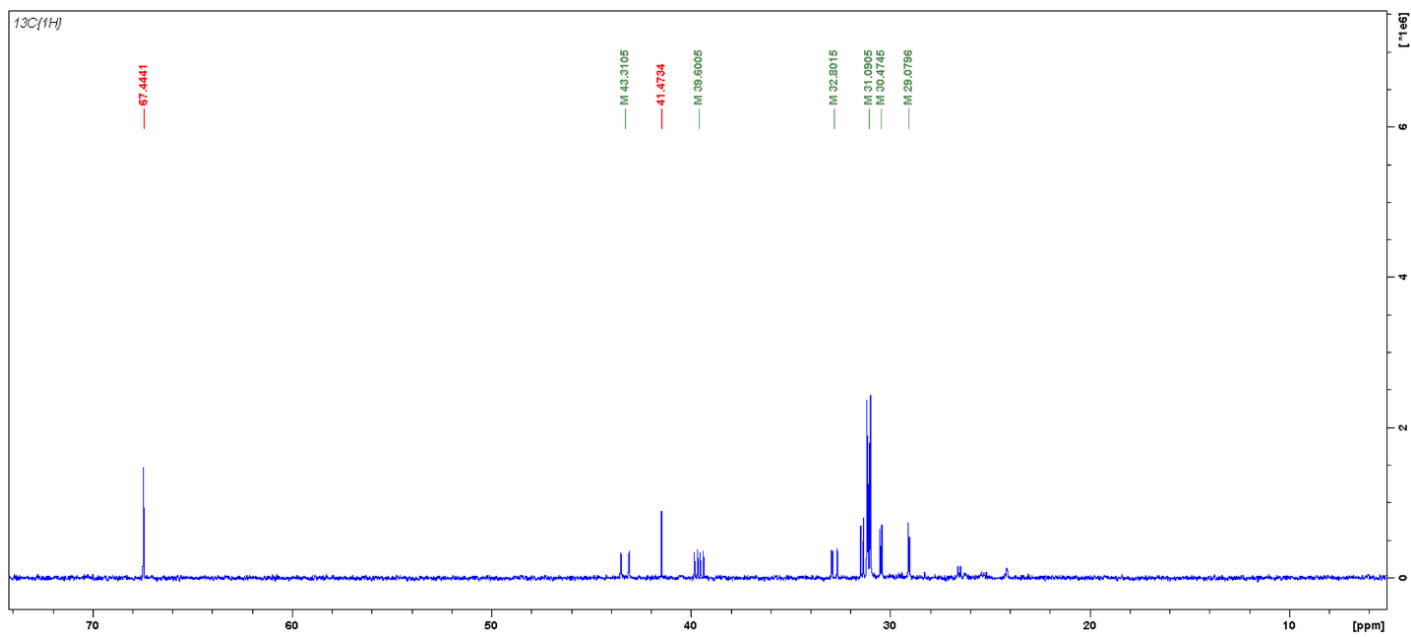

**Figure S20.**  $^{13}\text{C}\{^1\text{H}\}$ -NMR spectrum of isolated phosphanylphosphaalkene  $(\text{CH}_2)_5\text{C}=\text{P}-\text{PtBu}_2$  in the range from 70 ppm to 5 ppm.

6. NMR spectra of reaction mixture of **1** with cycloheptanone.

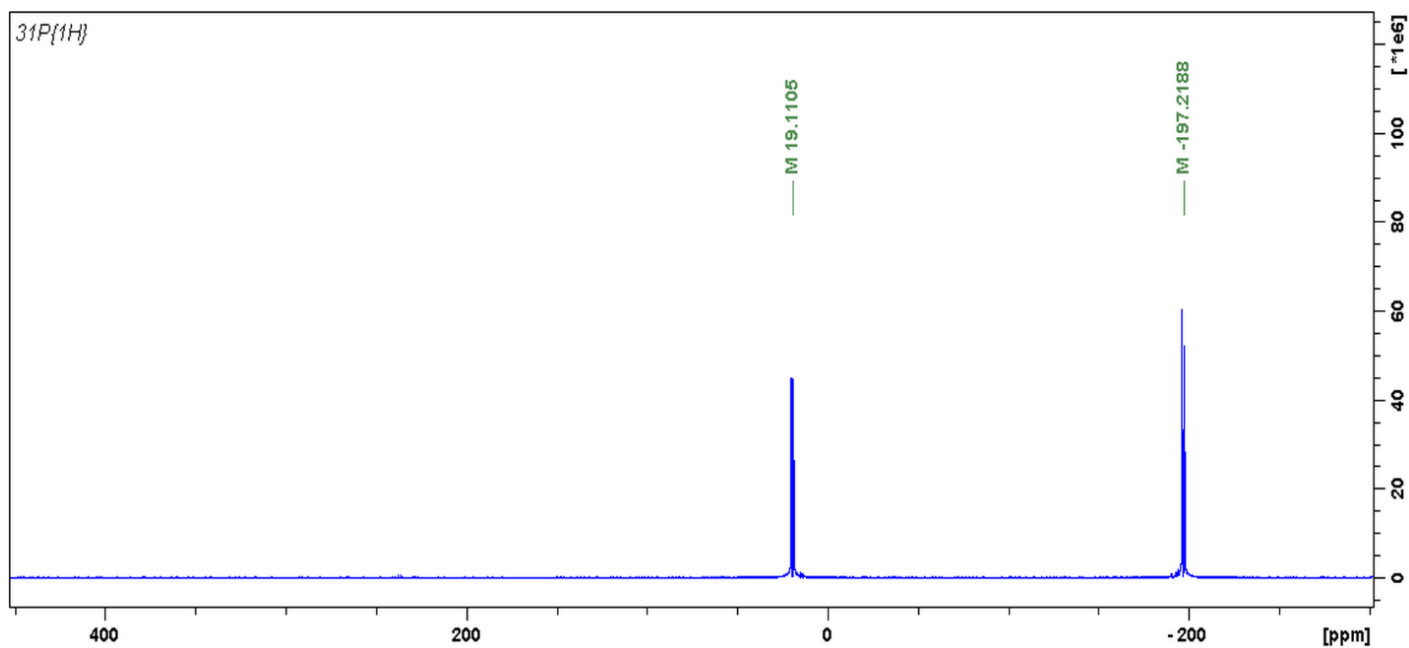

**Figure 21.**  $^{31}\text{P}\{^1\text{H}\}$ -NMR spectrum of reaction mixture after reaction of **1** with cycloheptanone.

- 19.11 ppm, (d),  $J_{\text{PP}} = 196.2$  Hz,  $t\text{Bu}_2\text{P}-\text{P}(\text{SiMe}_3)\text{H}$ ;
- -197.22 ppm, (d),  $J_{\text{PP}} = 196.2$  Hz,  $t\text{Bu}_2\text{P}-\text{P}(\text{SiMe}_3)\text{H}$ ;

7. NMR spectra of isolated crystals of **3**.

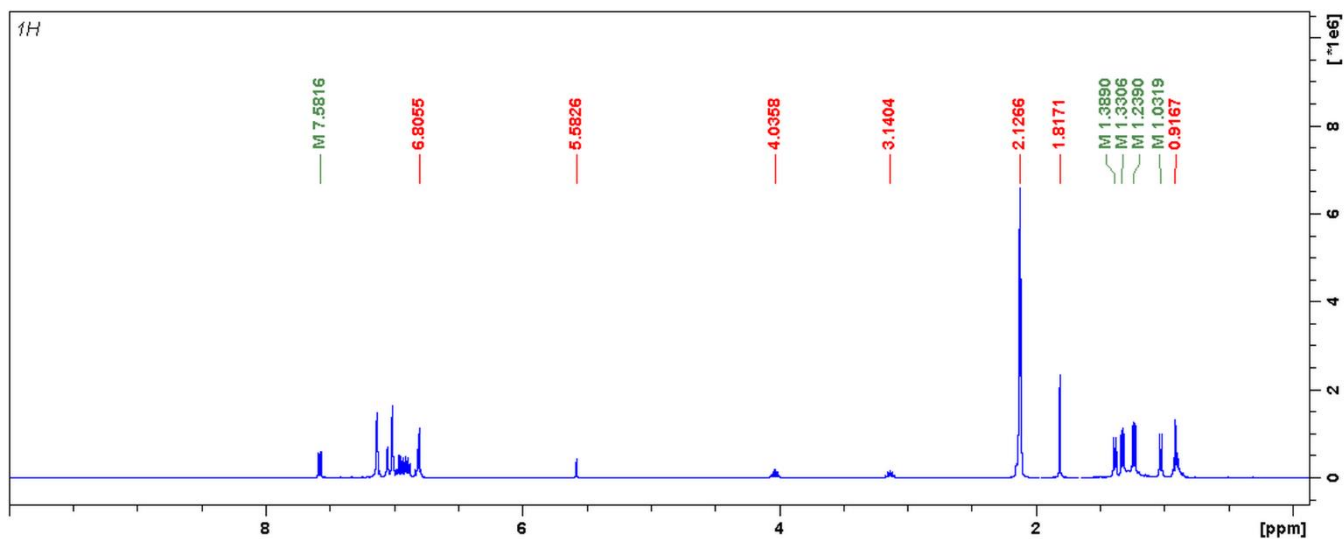

**Figure S22.**  $^1\text{H}$ -NMR spectrum of isolated crystals of **3**.

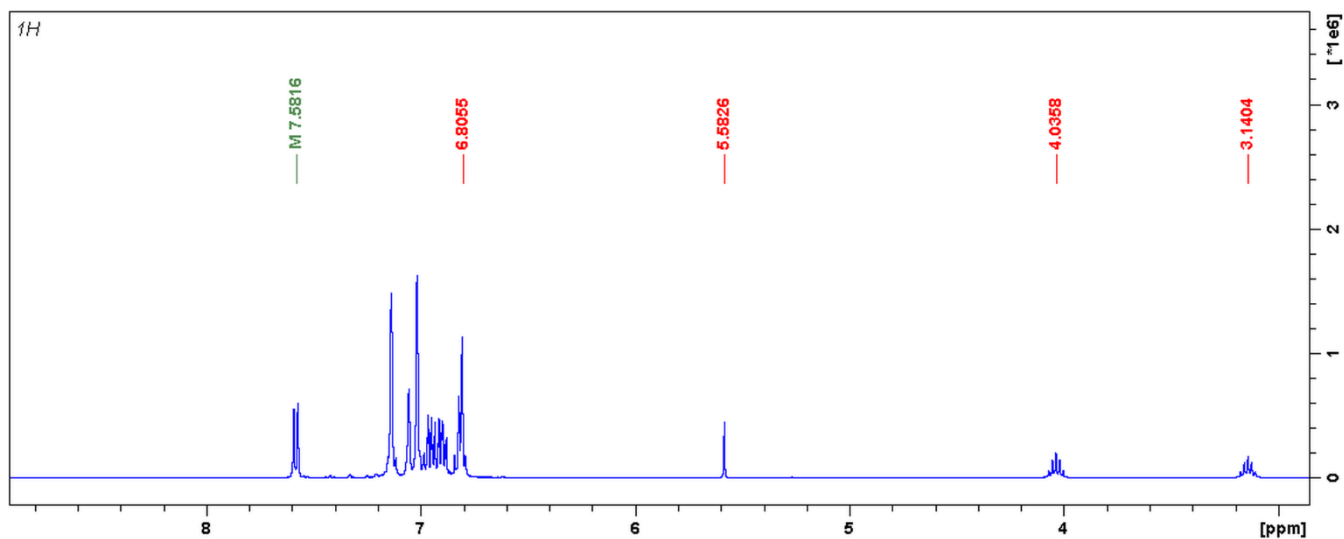

**Figure S23.**  $^1\text{H}$ -NMR spectrum of isolated crystals of **3** in the range from 9 ppm to 3 ppm.

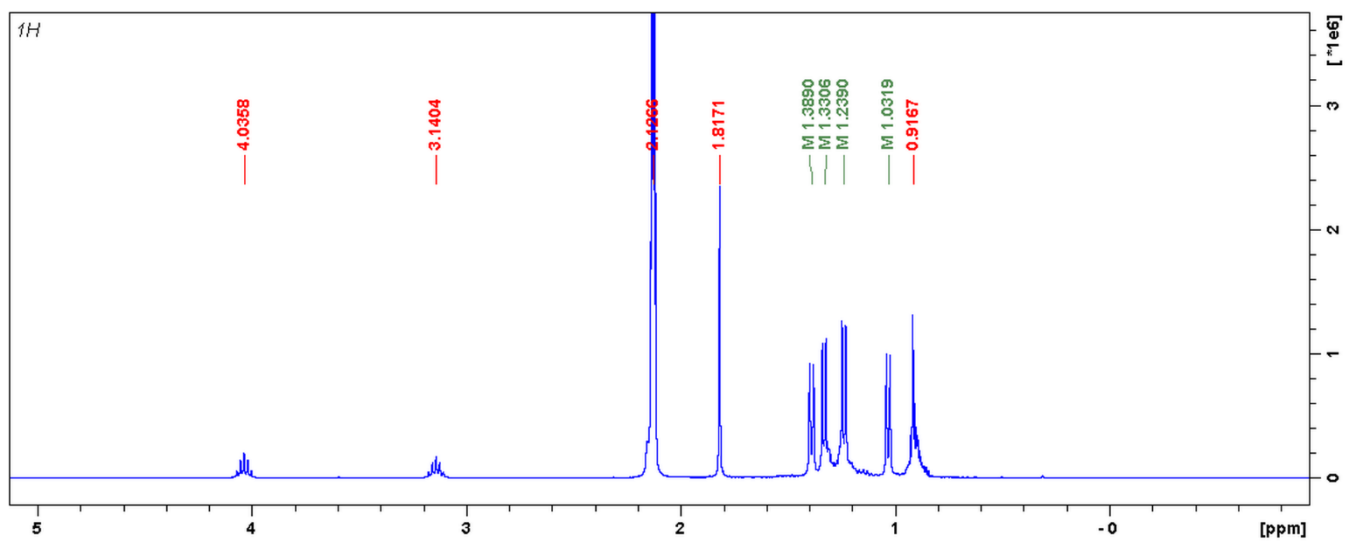

**Figure S24.** <sup>1</sup>H-NMR spectrum of isolated crystals of **3** in the range from 5 ppm to -1 ppm.

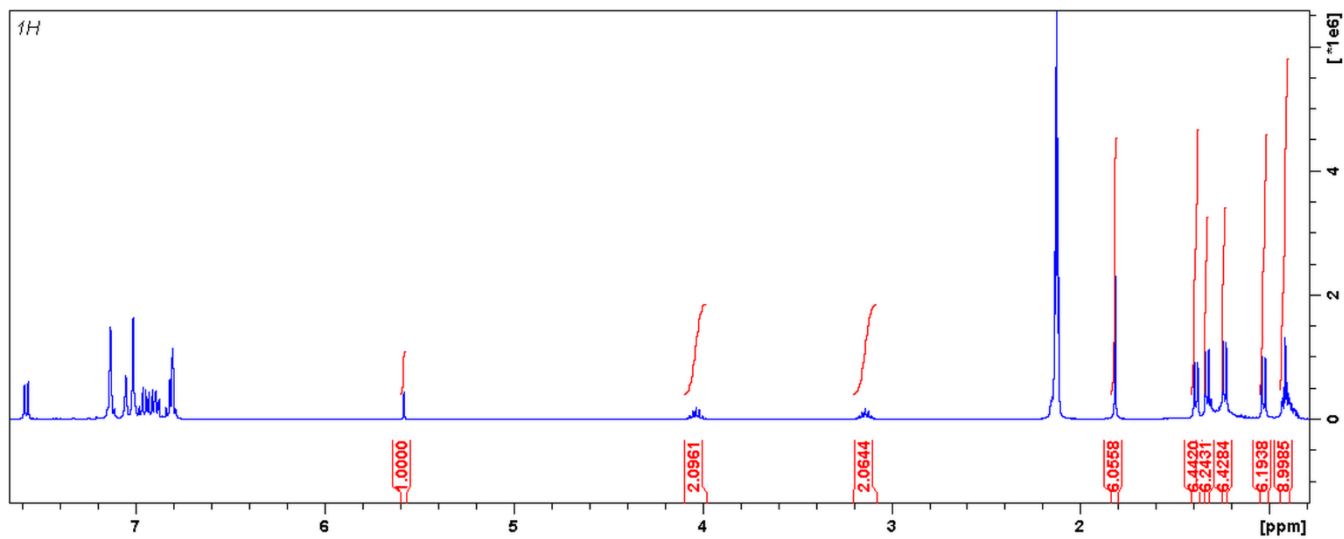

**Figure S25.** <sup>1</sup>H-NMR spectrum of isolated crystals of **3** with integration.

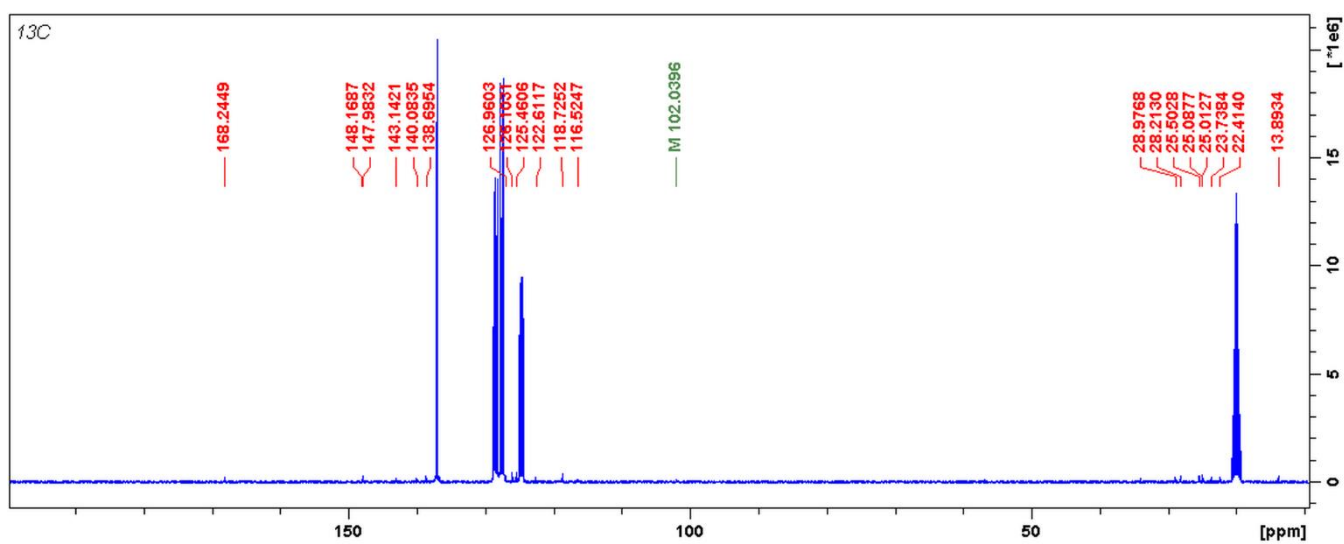

**Figure S26.** <sup>13</sup>C{<sup>1</sup>H}-NMR spectrum of isolated crystals of **3**.

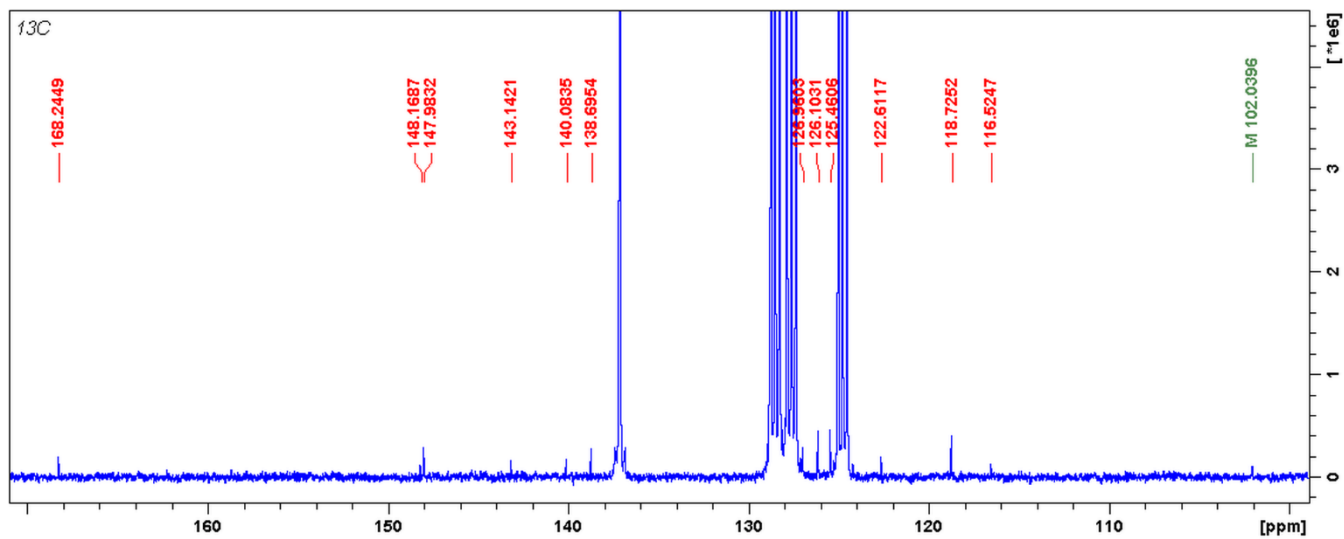

**Figure S27.** <sup>13</sup>C{<sup>1</sup>H}-NMR spectrum of isolated crystals of **3** in the range from 170 ppm to 100 ppm.

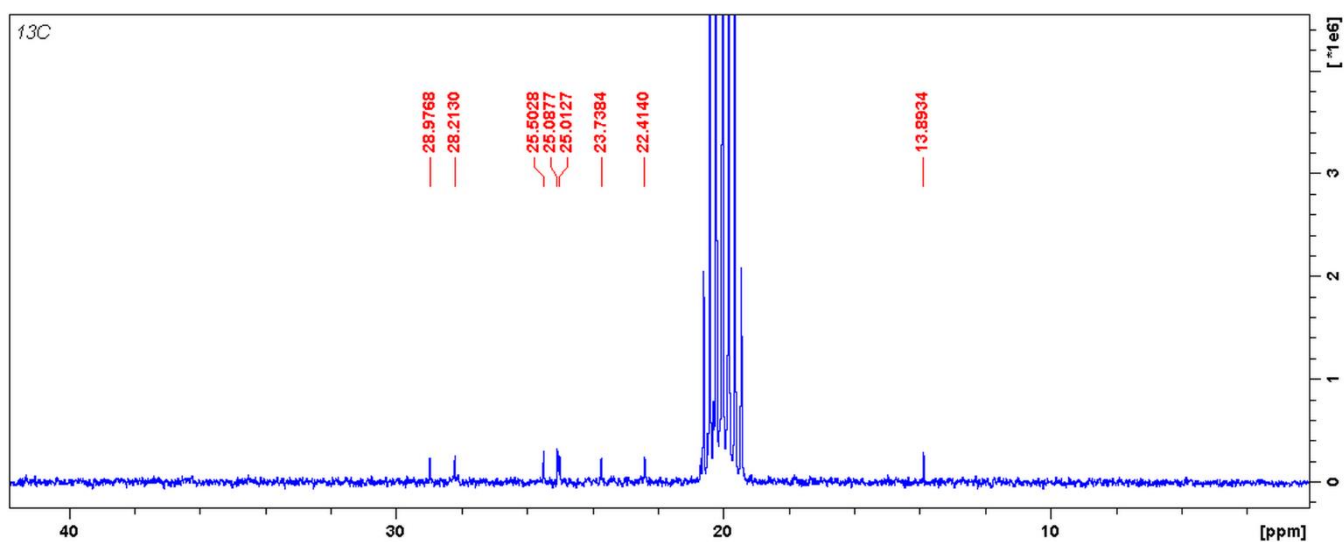

**Figure S28.** <sup>13</sup>C{<sup>1</sup>H}-NMR spectrum of isolated crystals of **3** in the range from 40 ppm to 0 ppm.

8.  $^{31}\text{P}\{^1\text{H}\}$ -NMR spectrum of reaction mixture of  $[\text{MeNacNacTi}(\text{Cl})\{\eta^2\text{-P-P}t\text{Bu}_2\}]$  (**4**) with 9-fluorenone.

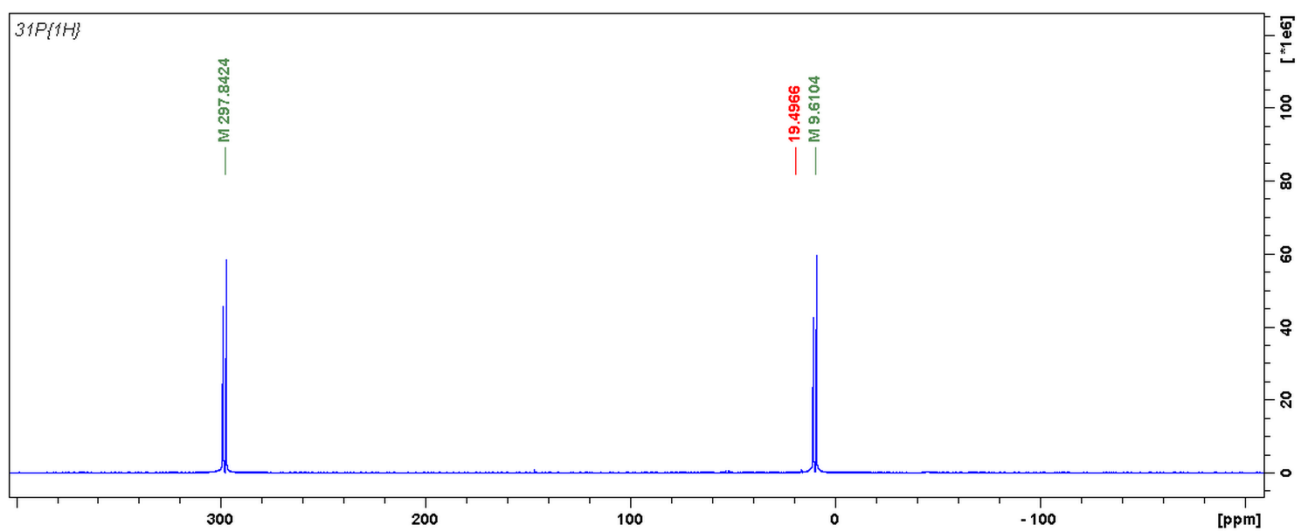

**Figure S29.**  $^{31}\text{P}\{^1\text{H}\}$ -NMR spectrum of reaction mixture of  $[\text{MeNacNacTi}(\text{Cl})\{\eta^2\text{-P-P}t\text{Bu}_2\}]$  (**4**) with 9-fluorenone.

- 297.84 ppm, (d),  $J_{\text{PP}} = 232.7$  Hz, (fluorenyl)C=P-PtBu<sub>2</sub>;
- 19.50 ppm, s, tBu<sub>2</sub>PH;
- 9.61 ppm, (d),  $J_{\text{PP}} = 232.7$  Hz, (fluorenyl)C=P-PtBu<sub>2</sub>;

9.  $^{31}\text{P}\{^1\text{H}\}$ -NMR spectrum of reaction mixture of [ $^{\text{Me}}\text{NacNacTi}(\text{Cl})\{\eta^2\text{-P-P}t\text{Bu}_2\}$ ] (**4**) with acetophenone.

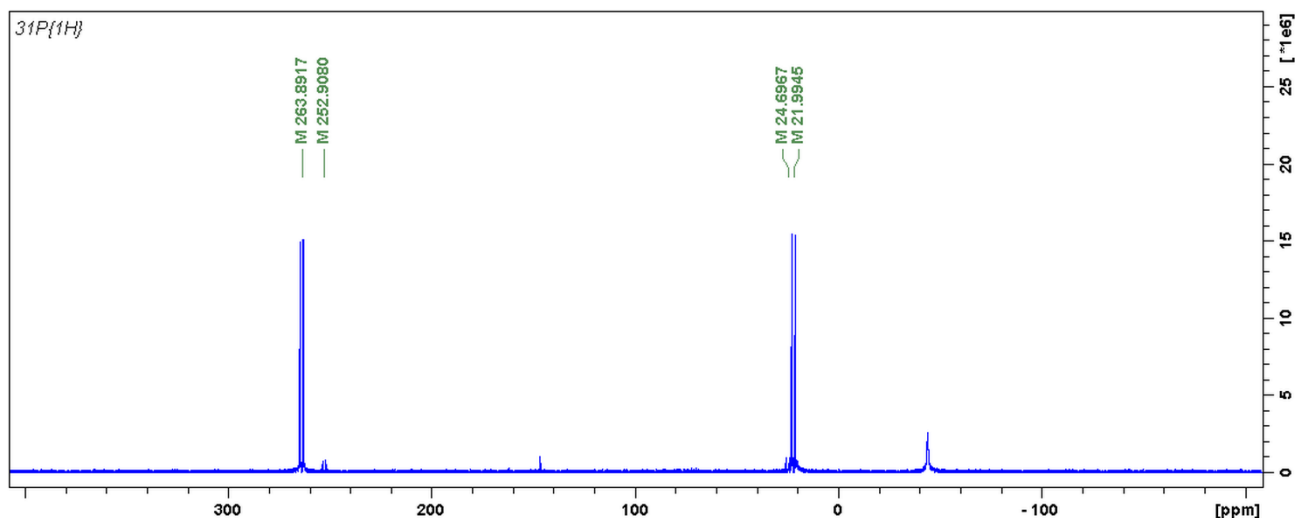

**Figure S30.**  $^{31}\text{P}\{^1\text{H}\}$ -NMR spectrum of reaction mixture of [ $^{\text{Me}}\text{NacNacTi}(\text{Cl})\{\eta^2\text{-P-P}t\text{Bu}_2\}$ ] (**4**) with acetophenone.

*E* - isomer:

- 263.89 ppm, (d),  $J_{\text{PP}} = 234.9$  Hz, (Ph)MeC=**P**-*Pt*Bu<sub>2</sub>;
- 21.99 ppm, (d),  $J_{\text{PP}} = 234.9$  Hz, (Ph)MeC=**P**-*Pt*Bu<sub>2</sub>;

Small amount of *Z* - isomer:

- 252.90 ppm, (d),  $J_{\text{PP}} = 222.8$  Hz, (Ph)MeC=**P**-*Pt*Bu<sub>2</sub>;
- 24.69 ppm, (d),  $J_{\text{PP}} = 222.8$  Hz, (Ph)MeC=**P**-*Pt*Bu<sub>2</sub>;



## PART B. X-RAY CRYSTALLOGRAPHIC DATA

Diffraction data of **3**, **5**, **8**, **10**, **11**, **11b**, and **12** were collected on a diffractometer IPDS2T equipped with a STOE image plate detector system IPDS2T and micro-focus X-ray sources providing  $K\alpha$  radiation by the high-grade multilayer X-ray mirror optics for Mo ( $\lambda = 0.71073 \text{ \AA}$ ) wavelengths. Good quality single-crystal specimens of **3**, **5**, **8**, **10**, **11**, **11b**, and **12** were selected for the X-ray diffraction experiments at 120 K. The structures were solved by direct methods and refined against  $F^2$  using the Shelxs-2008 and Shelxl-2008 programs<sup>1</sup> run under WinGX.<sup>2</sup> Non-hydrogen atoms were refined with anisotropic displacement parameters: hydrogen atoms were usually refined using the isotropic model with  $U_{\text{iso}}(\text{H})$  values fixed at 1.5  $U_{\text{eq}}$  of the C atoms for  $\text{CH}_3$  and 1.2  $U_{\text{eq}}$  for CH,  $\text{CH}_2$  and aromatic H. The voids in the crystal structure of **3** contain disordered solvent. A satisfactory disorder model for the solvent was not found, and therefore the PLATON/SQUEEZE program was used to mask out the disordered density. The voids in **3** contain two molecules of pentane disordered over at least two positions and also partially absent. A satisfactory refinement of the partial occupancy solvent density as a disorder was not found.

Crystallographic data for the structures of **3**, **5**, **8**, **10**, **11**, **11b**, and **12** reported in this paper have been deposited with the Cambridge Crystallographic Data Centre as supplementary publication No. CCDC 2004562-2004568. Copies of the data can be obtained free of charge on application to CCDC, 12 Union Road, Cambridge CB2 1EZ, UK (Fax: (+44) 1223-336-033; E mail: [deposit@ccdc.cam.ac.uk](mailto:deposit@ccdc.cam.ac.uk)).

**Table S1.** Crystallographic data for **3**, **5** and **8**.

|                                                  | <b>3</b>                                                                                                  | <b>5</b>                                                                                                       | <b>8</b>                                                                         |
|--------------------------------------------------|-----------------------------------------------------------------------------------------------------------|----------------------------------------------------------------------------------------------------------------|----------------------------------------------------------------------------------|
| Empirical formula                                | C <sub>58</sub> H <sub>66</sub> N <sub>2</sub> O <sub>3</sub> SiTi [+ solvent;<br>2 molecules of pentane] | C <sub>64</sub> H <sub>100</sub> Cl <sub>2</sub> N <sub>4</sub> O <sub>2</sub> Si <sub>2</sub> Ti <sub>2</sub> | C <sub>45</sub> H <sub>56</sub> Cl <sub>1</sub> N <sub>2</sub> O <sub>2</sub> Ti |
| Mw (g·mol <sup>-1</sup> )                        | 987.26                                                                                                    | 1180.35                                                                                                        | 740.26                                                                           |
| T[K]                                             | 120(2)                                                                                                    | 120(2)                                                                                                         | 120(2)                                                                           |
| Wavelength (Å)                                   | 0.71073                                                                                                   | 0.71073                                                                                                        | 0.71073                                                                          |
| Crystal System                                   | triclinic                                                                                                 | monoclinic                                                                                                     | monoclinic                                                                       |
| Space group                                      | <i>P</i> -1                                                                                               | <i>C</i> 2/ <i>c</i>                                                                                           | <i>P</i> 2 <sub>1</sub> / <i>n</i>                                               |
| <i>a</i> [Å]                                     | 11.8988(4)                                                                                                | 21.982(2)                                                                                                      | 17.3918(7)                                                                       |
| <i>b</i> [Å]                                     | 22.2268(8)                                                                                                | 14.2942(8)                                                                                                     | 10.7850(3)                                                                       |
| <i>c</i> [Å]                                     | 22.0748(7)                                                                                                | 22.987(2)                                                                                                      | 21.7583(9)                                                                       |
| $\alpha$ [°]                                     | 88.458(3)                                                                                                 | 90                                                                                                             | 90                                                                               |
| $\beta$ [°]                                      | 84.520(3)                                                                                                 | 114.710(7)                                                                                                     | 100.543(3)                                                                       |
| $\gamma$ [°]                                     | 74.716(3)                                                                                                 | 90                                                                                                             | 90                                                                               |
| <i>V</i> [Å <sup>3</sup> ]                       | 5605.9(3)                                                                                                 | 6561.6(10)                                                                                                     | 4012.3(3)                                                                        |
| <i>Z</i>                                         | 4                                                                                                         | 4                                                                                                              | 4                                                                                |
| $\rho$ [g·cm <sup>-3</sup> ]                     | 1.170                                                                                                     | 1.195                                                                                                          | 1.225                                                                            |
| $\mu$ [mm <sup>-1</sup> ]                        | 0.220                                                                                                     | 0.405                                                                                                          | 0.318                                                                            |
| F(000)                                           | 2120                                                                                                      | 2536                                                                                                           | 1580                                                                             |
| $\Theta$ range data collection (°)               | 1.85-25.73                                                                                                | 2.93-28.56                                                                                                     | 2.34-29.41                                                                       |
| Index ranges                                     | -15 ≤ <i>h</i> ≤ 15<br>-29 ≤ <i>k</i> ≤ 29<br>-29 ≤ <i>l</i> ≤ 29                                         | -28 ≤ <i>h</i> ≤ 28<br>-18 ≤ <i>k</i> ≤ 16<br>-30 ≤ <i>l</i> ≤ 23                                              | -22 ≤ <i>h</i> ≤ 22<br>-14 ≤ <i>k</i> ≤ 12<br>-28 ≤ <i>l</i> ≤ 21                |
| Reflection collected                             | 60887                                                                                                     | 16971                                                                                                          | 20254                                                                            |
| Independent reflections                          | 27045 [ <i>R</i> <sub>int</sub> = 0.1352]                                                                 | 8705 [ <i>R</i> <sub>int</sub> = 0.0920]                                                                       | 9557 [ <i>R</i> <sub>int</sub> = 0.0843]                                         |
| Data/restraints/parameters                       | 27045/0/1179                                                                                              | 8705/0/343                                                                                                     | 9557/1/481                                                                       |
| GooF an <i>F</i> <sup>2</sup>                    | 0.961                                                                                                     | 1.027                                                                                                          | 1.015                                                                            |
| Final <i>R</i> indices                           | <i>R</i> <sub>1</sub> = 0.0915                                                                            | <i>R</i> <sub>1</sub> = 0.0602                                                                                 | <i>R</i> <sub>1</sub> = 0.0621                                                   |
| [ <i>I</i> > 2σ( <i>I</i> )]                     | <i>wR</i> <sub>2</sub> = 0.2241                                                                           | <i>wR</i> <sub>2</sub> = 0.1612                                                                                | <i>wR</i> <sub>2</sub> = 0.1451                                                  |
| <i>R</i> indices (all data)                      | <i>R</i> <sub>1</sub> = 0.2188<br><i>wR</i> <sub>2</sub> = 0.2846                                         | <i>R</i> <sub>1</sub> = 0.1655<br><i>wR</i> <sub>2</sub> = 0.1988                                              | <i>R</i> <sub>1</sub> = 0.1209<br><i>wR</i> <sub>2</sub> = 0.1453                |
| Largest diff. peak and hole [e·Å <sup>-3</sup> ] | 0.493 and -0.716                                                                                          | 0.533 and -0.463                                                                                               | 0.351 and -0.439                                                                 |
| CCDC                                             | 2004565                                                                                                   | 2004562                                                                                                        | 2004567                                                                          |

**Table S2.** Crystallographic data for **10**, **11** and **11b**.

|                                                  | <b>10</b>                                                                                                                    | <b>11</b>                                                                                                                    | <b>11b</b>                                                                       |
|--------------------------------------------------|------------------------------------------------------------------------------------------------------------------------------|------------------------------------------------------------------------------------------------------------------------------|----------------------------------------------------------------------------------|
| Empirical formula                                | C <sub>50</sub> H <sub>84</sub> Cl <sub>1</sub> N <sub>2</sub> O <sub>2</sub> P <sub>2</sub> Si <sub>1</sub> Ti <sub>1</sub> | C <sub>55</sub> H <sub>95</sub> Cl <sub>1</sub> N <sub>2</sub> O <sub>2</sub> P <sub>2</sub> Si <sub>1</sub> Ti <sub>1</sub> | C <sub>41</sub> H <sub>60</sub> Cl <sub>1</sub> N <sub>2</sub> O <sub>2</sub> Ti |
| Mw (g·mol <sup>-1</sup> )                        | 918.57                                                                                                                       | 989.70                                                                                                                       | 696.26                                                                           |
| T[K]                                             | 120(2)                                                                                                                       | 120(2)                                                                                                                       | 120(2)                                                                           |
| Wavelength (Å)                                   | 0.71073                                                                                                                      | 0.71073                                                                                                                      | 0.71073                                                                          |
| Crystal System                                   | monoclinic                                                                                                                   | triclinic                                                                                                                    | monoclinic                                                                       |
| Space group                                      | <i>P</i> 2 <sub>1</sub> / <i>c</i>                                                                                           | <i>P</i> -1                                                                                                                  | <i>P</i> 2 <sub>1</sub> / <i>c</i>                                               |
| <i>a</i> [Å]                                     | 9.7360(2)                                                                                                                    | 9.9454(4)                                                                                                                    | 16.9626(9)                                                                       |
| <i>b</i> [Å]                                     | 27.4049(6)                                                                                                                   | 10.3200(5)                                                                                                                   | 11.7424(6)                                                                       |
| <i>c</i> [Å]                                     | 19.8324(3)                                                                                                                   | 27.9616(10)                                                                                                                  | 19.4368(10)                                                                      |
| $\alpha$ [°]                                     | 90                                                                                                                           | 100.356(3)                                                                                                                   | 90                                                                               |
| $\beta$ [°]                                      | 96.6120(10)                                                                                                                  | 91.107(3)                                                                                                                    | 98.640(4)                                                                        |
| $\gamma$ [°]                                     | 90                                                                                                                           | 95.680(3)                                                                                                                    | 90                                                                               |
| <i>V</i> [Å <sup>3</sup> ]                       | 5256.37(18)                                                                                                                  | 2807.2(2)                                                                                                                    | 3827.5(3)                                                                        |
| <i>Z</i>                                         | 4                                                                                                                            | 2                                                                                                                            | 4                                                                                |
| $\rho$ [g·cm <sup>-3</sup> ]                     | 1.161                                                                                                                        | 1.171                                                                                                                        | 1.208                                                                            |
| $\mu$ [mm <sup>-1</sup> ]                        | 0.335                                                                                                                        | 0.318                                                                                                                        | 0.330                                                                            |
| F(000)                                           | 1988                                                                                                                         | 1076                                                                                                                         | 1500                                                                             |
| $\Theta$ range data collection (°)               | 2.20-29.55                                                                                                                   | 2.22-29.58                                                                                                                   | 2.03-29.29                                                                       |
| Index ranges                                     | -11 ≤ <i>h</i> ≤ 13<br>-37 ≤ <i>k</i> ≤ 37<br>-27 ≤ <i>l</i> ≤ 27                                                            | -11 ≤ <i>h</i> ≤ 13<br>-13 ≤ <i>k</i> ≤ 13<br>-36 ≤ <i>l</i> ≤ 36                                                            | -23 ≤ <i>h</i> ≤ 23<br>-16 ≤ <i>k</i> ≤ 16<br>-26 ≤ <i>l</i> ≤ 22                |
| Reflection collected                             | 41202                                                                                                                        | 26152                                                                                                                        | 25621                                                                            |
| Independent reflections                          | 14122 [ <i>R</i> <sub>int</sub> = 0.0702]                                                                                    | 13376 [ <i>R</i> <sub>int</sub> = 0.0814]                                                                                    | 10254 [ <i>R</i> <sub>int</sub> = 0.0843]                                        |
| Data/restraints/parameters                       | 14122/0/551                                                                                                                  | 13376/0/598                                                                                                                  | 10254/0/424                                                                      |
| GooF an <i>F</i> <sup>2</sup>                    | 1.025                                                                                                                        | 1.043                                                                                                                        | 1.009                                                                            |
| Final <i>R</i> indices                           | <i>R</i> <sub>1</sub> = 0.0560                                                                                               | <i>R</i> <sub>1</sub> = 0.0963                                                                                               | <i>R</i> <sub>1</sub> = 0.0548                                                   |
| [ <i>I</i> > 2σ( <i>I</i> )]                     | <i>wR</i> <sub>2</sub> = 0.0973                                                                                              | <i>wR</i> <sub>2</sub> = 0.1363                                                                                              | <i>wR</i> <sub>2</sub> = 0.1222                                                  |
| <i>R</i> indices (all data)                      | <i>R</i> <sub>1</sub> = 0.1329<br><i>wR</i> <sub>2</sub> = 0.1560                                                            | <i>R</i> <sub>1</sub> = 0.2533<br><i>wR</i> <sub>2</sub> = 0.2881                                                            | <i>R</i> <sub>1</sub> = 0.1194<br><i>wR</i> <sub>2</sub> = 0.1383                |
| Largest diff. peak and hole [e·Å <sup>-3</sup> ] | 0.91 and -0.553                                                                                                              | -1.268 and -1.204                                                                                                            | 0.381 and -0.435                                                                 |
| CCDC                                             | 2004563                                                                                                                      | 2004564                                                                                                                      | 2004566                                                                          |

**Table S3.** Crystallographic data for **12**.

|                                                  | <b>12</b>                                                                                     |
|--------------------------------------------------|-----------------------------------------------------------------------------------------------|
| Empirical formula                                | C <sub>43</sub> H <sub>64</sub> Cl <sub>1</sub> N <sub>2</sub> O <sub>2</sub> Ti <sub>1</sub> |
| Mw (g·mol <sup>-1</sup> )                        | 724.31                                                                                        |
| T[K]                                             | 120(2)                                                                                        |
| Wavelength (Å)                                   | 0.71073                                                                                       |
| Crystal System                                   | monoclinic                                                                                    |
| Space group                                      | C2/c                                                                                          |
| <i>a</i> [Å]                                     | 23.6443(16)                                                                                   |
| <i>b</i> [Å]                                     | 18.6688(7)                                                                                    |
| <i>c</i> [Å]                                     | 19.2429(10)                                                                                   |
| $\alpha$ [°]                                     | 90                                                                                            |
| $\beta$ [°]                                      | 109.089(5)                                                                                    |
| $\gamma$ [°]                                     | 90                                                                                            |
| <i>V</i> [Å <sup>3</sup> ]                       | 8026.9(8)                                                                                     |
| <i>Z</i>                                         | 8                                                                                             |
| $\rho$ [g·cm <sup>-3</sup> ]                     | 1.199                                                                                         |
| $\mu$ [mm <sup>-1</sup> ]                        | 0.317                                                                                         |
| F(000)                                           | 3128                                                                                          |
| $\Theta$ range data collection (°)               | 2.83-28.75                                                                                    |
| Index ranges                                     | -32 ≤ <i>h</i> ≤ 32<br>-25 ≤ <i>k</i> ≤ 21<br>-24 ≤ <i>l</i> ≤ 26                             |
| Reflection collected                             | 27717                                                                                         |
| Independent reflections                          | 10746 [ <i>R</i> <sub>int</sub> = 0.0503]                                                     |
| Data/restraints/parameters                       | 10746/123/464                                                                                 |
| GooF an <i>F</i> <sup>2</sup>                    | 1.066                                                                                         |
| Final <i>R</i> indices                           | <i>R</i> <sub>1</sub> = 0.0709                                                                |
| [ <i>I</i> > 2σ( <i>I</i> )]                     | <i>wR</i> <sub>2</sub> = 0.1299                                                               |
| <i>R</i> indices (all data)                      | <i>R</i> <sub>1</sub> = 0.1875<br><i>wR</i> <sub>2</sub> = 0.2140                             |
| Largest diff. peak and hole [e·Å <sup>-3</sup> ] | 0.717 and -0.620                                                                              |
| CCDC                                             | 2004568                                                                                       |

Molecular structure of [<sup>Me</sup>NacNacTi(Cl){OC(CH<sub>2</sub>)<sub>4</sub>}CH(C=O)(CH<sub>2</sub>)<sub>5</sub>] (**11b**)

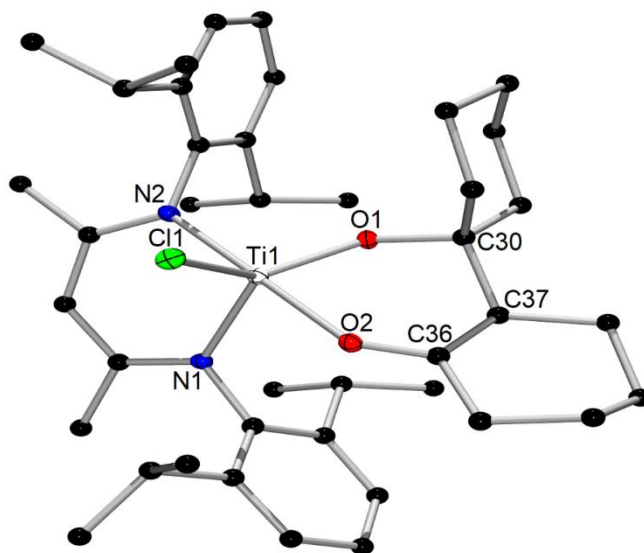

**Figure S31.** The molecular structures of [<sup>Me</sup>NacNacTi(Cl){OC(CH<sub>2</sub>)<sub>4</sub>}CH(C=O)(CH<sub>2</sub>)<sub>5</sub>] (**11b**) (ellipsoids 50%, hydrogen atoms have been omitted for clarity). Important bond lengths (Å) and bond angles (°): Ti1-Cl1 2.3243(7). Ti-N1 2.0733(19), Ti1-N2 2.1238(19), Ti1-O1 1.8302(16), Ti1-O2 2.1068(16), O1-C30 1.434(3), O2-C36 1.230(3); O1-Ti1-N1 118.22(8), O1-Ti1-O2 84.11(7), N1-Ti1-O2 92.53(7), O1-Ti1-N2 96.06(7), N1-Ti1-N2 87.06(7), O2-Ti1-N2 179.58(7), O1-Ti1-Cl1 132.37(6), N1-Ti1-Cl1 108.45(6), O2-Ti1-Cl1 84.95(5), N2-Ti1-Cl1 95.21(6).

Molecular structure of [<sup>Me</sup>NacNacTi(Cl){OC(CH<sub>2</sub>)<sub>6</sub>}CH(C=O)(CH<sub>2</sub>)<sub>5</sub>] (**12**)

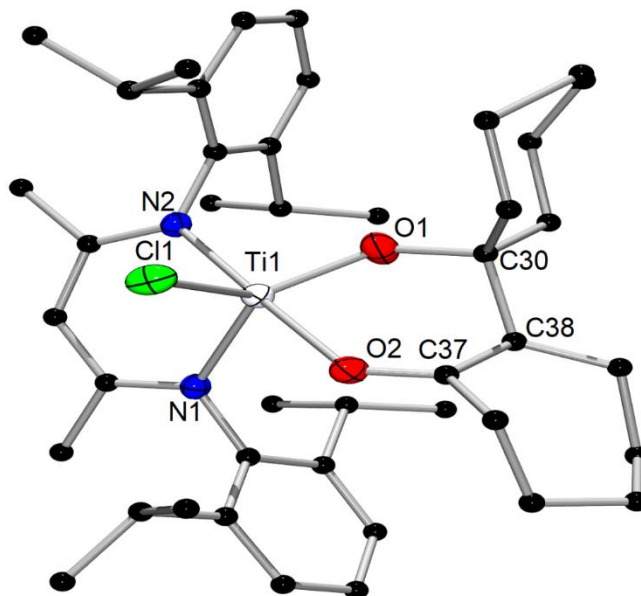

**Figure S32.** The molecular structures of [<sup>Me</sup>NacNacTi(Cl){OC(CH<sub>2</sub>)<sub>6</sub>}CH(C=O)(CH<sub>2</sub>)<sub>5</sub>] (**12**) (ellipsoids 50%, hydrogen atoms have been omitted for clarity). The second disorder component of the {OC(CH<sub>2</sub>)<sub>5</sub>}CH(C=O)(CH<sub>2</sub>)<sub>6</sub> ligand (site-occupancy factor = 0.242) and of selected methyl of *iso*-propyl groups (site-occupancy factor = 0.528) have been omitted. Important bond lengths (Å) and bond angles (°): Ti1-Cl1 2.3304(10), Ti1-N1 2.078(2), Ti1-N2 2.115(2), Ti1-O1 1.840(5), Ti1-O2 2.146(5), O1-C30 1.399(11), O2-C37 1.167(8); O1-Ti1-N1 131.02(15), O1-Ti1-N2 95.08(15), N1-Ti1-N2 88.00(9), O1-Ti1-O2 83.40(2), N1-Ti1-O2 92.74(19), N2-Ti1-O2 178.47(18), O1-Ti1-Cl1 122.75(14), N1-Ti1-Cl1 105.05(7), N2-Ti1-Cl1 97.77(7), O2-Ti1-Cl1 83.33(14), O1-C30-C31 109.30(6), O1-C30-C36 112.80(6).

## PART C. DFT CALCULATIONS DATA

Molecular geometries of compounds **2**, **6**, **9\_E**, **9\_Z**, **10a**, **11a** were optimized using density functional theory at the  $\omega$ B97XD functional by Head-Gordon<sup>3,4</sup> with 6-31+G(d,p) basis set. The  $\omega$ B97XD exchange-correlation functional has been chosen as it has good overall performance for the description of main-group element compounds, and it also accounts well for long-range and dispersion interactions. Molecular geometries were energy optimized and the most stable (the lowest energy) conformer was identified during the potential energy surface scanning of the C-P-P-C dihedral. Nature of the final gas phase geometries as a local minima (no imaginary frequencies on the potential energy surface were then validated by harmonic frequency calculations at the same level of theory. Theoretical <sup>31</sup>P NMR shift were determined by calculating NMR shielding tensors using Gauge-Independent Atomic Orbital (GIAO)<sup>5</sup> method at the mn12sx/cc-pvdz level of theory including presence of a solvent (benzene) using the CPCM polarizable conductor calculation model.<sup>6</sup> All calculations presented in the paper were performed using the Gaussian 09<sup>7</sup> program package.

**Table S4.** Selected computational parameters obtained for considered systems (in atomic units [A.U.]):  $\epsilon_0$  - electronic energy;  $\epsilon_0 + \dots$  - sum of electronic and:  $E_{zpe}$  - zero-point energies,  $E_{therm}$  - thermal energies,  $H$  - thermal enthalpies,  $G$  - thermal free energies calculated at  $\omega$ B97XD//6-31+G(d,p)

| Compound                                                             | Imaginary frequencies | $E_{electr}$ [A.U.] | $\epsilon_0 + E_{ZPE}$ [A.U.] | $\epsilon_0 + E_{therm}$ [A.U.] | $\epsilon_0 + H$ [A.U.] | $\epsilon_0 + G$ [A.U.] |
|----------------------------------------------------------------------|-----------------------|---------------------|-------------------------------|---------------------------------|-------------------------|-------------------------|
| Ph <sub>2</sub> C=P-PtBu <sub>2</sub> ( <b>2</b> )                   | 0                     | -1499.560716        | -1499.120101                  | -1499.095741                    | -1499.094797            | -1499.174031            |
| (fluorene)C=P-PtBu <sub>2</sub> ( <b>6</b> )                         | 0                     | -1498.365059        | -1497.946382                  | -1497.923113                    | -1497.922169            | -1497.998378            |
| Z-(Ph)MeC=P-PtBu <sub>2</sub> ( <b>9_Z</b> )                         | 0                     | -1307.878866        | -1307.491823                  | -1307.470664                    | -1307.469720            | -1307.540584            |
| E-(Ph)MeC=P-PtBu <sub>2</sub> ( <b>9_E</b> )                         | 0                     | -1307.877987        | -1307.491965                  | -1307.470475                    | -1307.469531            | -1307.541486            |
| (CH <sub>2</sub> ) <sub>4</sub> C=P-PtBu <sub>2</sub> ( <b>10a</b> ) | 0                     | -1193.601933        | -1193.232083                  | -1193.213097                    | -1193.212153            | -1193.277902            |
| (CH <sub>2</sub> ) <sub>5</sub> C=P-PtBu <sub>2</sub> ( <b>11a</b> ) | 0                     | -1232.915393        | -1232.515647                  | -1232.495768                    | -1232.494824            | -1232.562558            |

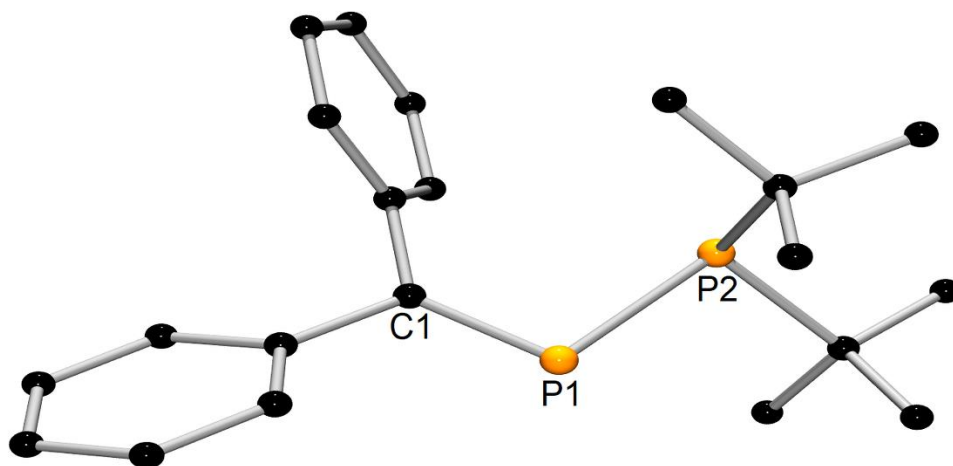

**Figure S33.** Optimized geometry of  $\text{Ph}_2\text{C}=\text{P}-\text{PtBu}_2$  (**2**) (hydrogen atoms have been omitted for clarity). Important bond lengths (Å), bond angles (deg.): P1-P2 2.228, C1-P1 1.697; C1-P1-P2 104.88.

Below are presented xyz coordinates for optimized geometry of **2**:

|   |          |          |          |
|---|----------|----------|----------|
| C | -0.81400 | 3.36500  | -1.36500 |
| C | -0.74700 | 1.97500  | -1.33600 |
| C | -1.27700 | 1.26000  | -0.25800 |
| C | -1.89300 | 1.96700  | 0.78200  |
| C | -1.94300 | 3.35700  | 0.76400  |
| C | -1.40300 | 4.06100  | -0.31200 |
| H | -0.40100 | 3.90400  | -2.21200 |
| H | -2.41000 | 3.88900  | 1.58700  |
| C | -1.23100 | -0.22600 | -0.21100 |
| P | 0.13700  | -1.22600 | -0.30400 |
| P | 1.87200  | 0.16800  | -0.20900 |
| C | 2.26500  | 0.09300  | 1.66200  |
| C | 1.26400  | 1.07500  | 2.29900  |
| C | 2.11700  | -1.26700 | 2.36000  |
| C | 3.68600  | 0.62800  | 1.89000  |
| H | 1.31800  | 2.06700  | 1.84100  |
| H | 0.23500  | 0.71600  | 2.20100  |
| H | 1.48000  | 1.17600  | 3.37000  |
| H | 2.81300  | -2.01400 | 1.97600  |
| H | 2.31900  | -1.14300 | 3.43200  |
| H | 1.10300  | -1.66800 | 2.26300  |
| H | 3.84200  | 0.79900  | 2.96300  |
| H | 4.44700  | -0.08500 | 1.56100  |
| H | 3.85200  | 1.57900  | 1.37200  |
| C | 3.14100  | -0.85800 | -1.19700 |
| C | 4.37700  | 0.03100  | -1.43000 |
| C | 3.58000  | -2.19600 | -0.59200 |
| C | 2.49600  | -1.11500 | -2.57300 |
| H | 4.10200  | 0.97800  | -1.90500 |
| H | 4.90800  | 0.26200  | -0.50400 |
| H | 5.08000  | -0.48900 | -2.09200 |
| H | 2.72700  | -2.84000 | -0.35600 |



|   |          |          |          |
|---|----------|----------|----------|
| H | 4.21600  | -2.73300 | -1.30700 |
| H | 4.16600  | -2.05400 | 0.32000  |
| H | 3.25100  | -1.51700 | -3.25900 |
| H | 1.68000  | -1.84200 | -2.51800 |
| H | 2.10300  | -0.19100 | -3.01400 |
| H | -0.28500 | 1.43600  | -2.15600 |
| H | -2.32600 | 1.42000  | 1.61500  |
| H | -1.45000 | 5.14500  | -0.33200 |
| C | -2.55400 | -0.89700 | -0.08700 |
| C | -2.72100 | -2.07300 | 0.65900  |
| C | -3.67600 | -0.35700 | -0.73700 |
| C | -3.96000 | -2.70300 | 0.73000  |
| H | -1.87500 | -2.48300 | 1.20100  |
| C | -4.91200 | -0.98800 | -0.66600 |
| H | -3.57100 | 0.56100  | -1.30700 |
| C | -5.06000 | -2.16500 | 0.06600  |
| H | -4.06800 | -3.61000 | 1.31600  |
| H | -5.76500 | -0.55700 | -1.18200 |
| H | -6.02800 | -2.65200 | 0.12800  |

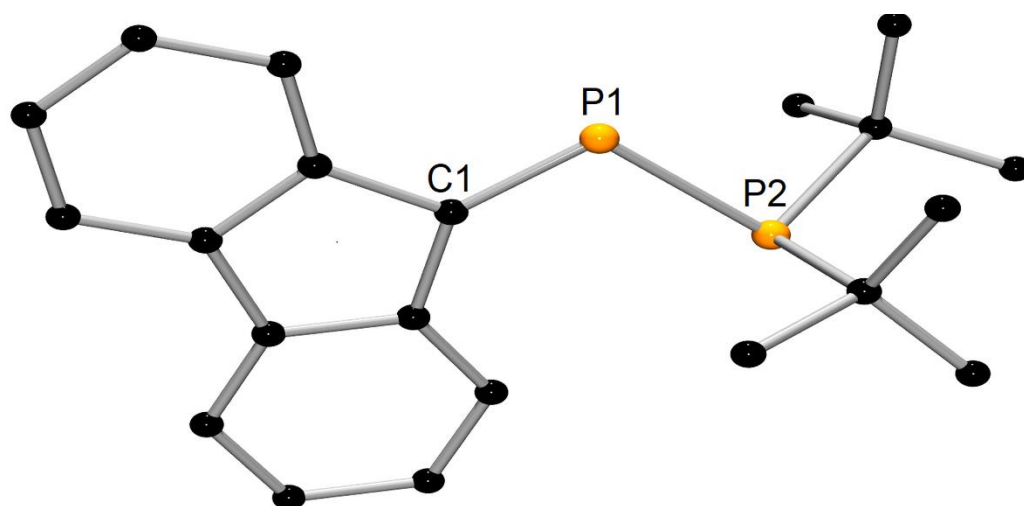

**Figure S34.** Optimized geometry of (fluorenyl)C=P-PtBu<sub>2</sub> (**6**) (hydrogen atoms have been omitted for clarity). Important bond lengths (Å), bond angles (deg.): P1-P2 2.219, C1-P1 1.691; C1-P1-P2 107.67.

Below are presented xyz coordinates for optimized geometry of **6**:

|   |          |          |          |
|---|----------|----------|----------|
| P | 0.40900  | -1.19300 | 0.04000  |
| P | 2.02300  | 0.30800  | 0.30000  |
| C | 2.53000  | 0.65800  | -1.51100 |
| C | 1.26300  | 1.11600  | -2.25600 |
| C | 3.51000  | 1.84600  | -1.48400 |
| C | 3.16000  | -0.51100 | -2.27700 |
| H | 0.55400  | 0.29800  | -2.40600 |
| H | 0.74300  | 1.92300  | -1.73100 |
| H | 1.54900  | 1.49300  | -3.24600 |
| H | 4.44700  | 1.60600  | -0.97600 |
| H | 3.75700  | 2.13600  | -2.51300 |
| H | 3.06800  | 2.71400  | -0.98500 |
| H | 3.31500  | -0.21800 | -3.32300 |
| H | 4.13600  | -0.78800 | -1.87000 |
| H | 2.51800  | -1.39800 | -2.27000 |
| C | 3.31000  | -0.80800 | 1.15800  |
| C | 3.46800  | -2.24800 | 0.64400  |
| C | 4.67700  | -0.10700 | 1.11900  |
| C | 2.83300  | -0.86500 | 2.62200  |
| H | 2.53800  | -2.81600 | 0.71900  |
| H | 3.80600  | -2.28900 | -0.39300 |
| H | 4.21800  | -2.76300 | 1.25700  |
| H | 4.60800  | 0.94100  | 1.42800  |
| H | 5.36400  | -0.61500 | 1.80800  |
| H | 5.12700  | -0.14700 | 0.12300  |
| H | 3.54200  | -1.45600 | 3.21600  |
| H | 2.76500  | 0.13400  | 3.06300  |
| H | 1.85100  | -1.34300 | 2.71200  |
| C | -1.06900 | -0.37600 | 0.11900  |
| C | -2.32300 | -1.15900 | -0.08100 |

|   |          |          |          |
|---|----------|----------|----------|
| C | -1.52700 | 1.01900  | 0.34000  |
| C | -2.51000 | -2.51700 | -0.32400 |
| C | -3.43200 | -0.29800 | -0.00300 |
| C | -0.82400 | 2.19000  | 0.61600  |
| C | -2.93700 | 1.05800  | 0.26200  |
| C | -3.80900 | -3.00100 | -0.48100 |
| H | -1.66300 | -3.19200 | -0.39100 |
| C | -4.72500 | -0.78000 | -0.16300 |
| C | -1.52900 | 3.38100  | 0.79800  |
| H | 0.25600  | 2.18000  | 0.70100  |
| C | -3.63500 | 2.24400  | 0.43900  |
| C | -4.90700 | -2.14200 | -0.40300 |
| H | -3.96600 | -4.05900 | -0.66800 |
| H | -5.58000 | -0.11300 | -0.10300 |
| C | -2.92000 | 3.41200  | 0.70500  |
| H | -0.98300 | 4.29400  | 1.01600  |
| H | -4.71900 | 2.26500  | 0.37500  |
| H | -5.90900 | -2.53700 | -0.53000 |
| H | -3.45000 | 4.34900  | 0.84500  |

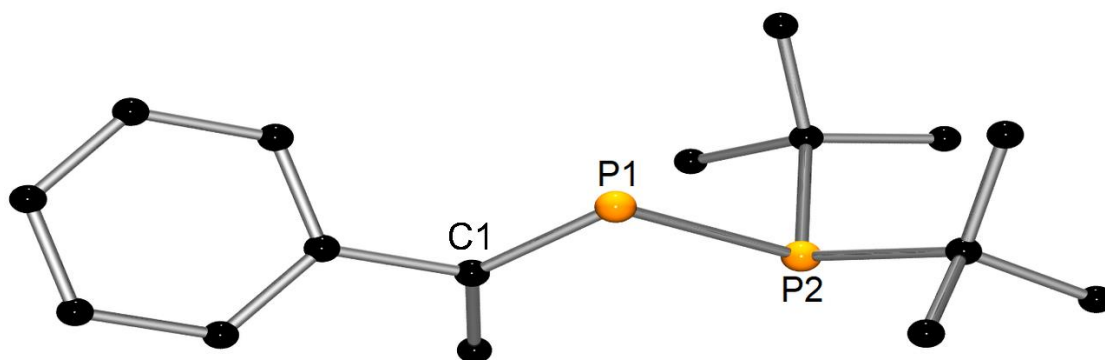

**Figure S35.** Optimized geometry for *Z*-isomer of (Ph)MeC=P-*t*Bu<sub>2</sub> (**9**) (hydrogen atoms have been omitted for clarity). Important bond lengths (Å), bond angles (deg.): P1-P2 2.223, C1-P1 1.682; C1-P1-P2 103.80.

Below are presented xyz coordinates for optimized geometry for *Z*-isomer of **9**:

|   |          |          |          |
|---|----------|----------|----------|
| C | 4.51900  | 0.50400  | -1.46000 |
| C | 3.20600  | 0.55000  | -0.99800 |
| C | 2.84600  | -0.06000 | 0.21200  |
| C | 3.84800  | -0.70700 | 0.95100  |
| C | 5.15700  | -0.75900 | 0.48600  |
| C | 5.50000  | -0.15200 | -0.72100 |
| H | 4.77400  | 0.98900  | -2.39700 |
| H | 5.91200  | -1.27900 | 1.06800  |
| C | 1.43500  | -0.02500 | 0.69500  |
| P | 0.25900  | -0.46200 | -0.44000 |
| P | -1.66100 | -0.11400 | 0.62500  |
| C | -2.11000 | 1.62800  | -0.02800 |
| C | -1.27100 | 2.58800  | 0.83700  |
| C | -1.80200 | 1.91800  | -1.50500 |
| C | -3.59700 | 1.90200  | 0.24300  |
| H | -1.47000 | 2.45000  | 1.90400  |
| H | -0.19800 | 2.44600  | 0.66700  |
| H | -1.51200 | 3.62600  | 0.57500  |
| H | -2.37300 | 1.28300  | -2.18400 |
| H | -2.06000 | 2.96200  | -1.72800 |
| H | -0.74000 | 1.78600  | -1.73200 |
| H | -3.80700 | 2.96500  | 0.07200  |
| H | -4.24400 | 1.33000  | -0.42800 |
| H | -3.87300 | 1.66600  | 1.27600  |
| C | -2.75100 | -1.43900 | -0.20300 |
| C | -4.08800 | -1.48900 | 0.55900  |
| C | -3.01900 | -1.27100 | -1.70300 |
| C | -2.03600 | -2.78400 | 0.03200  |
| H | -3.92800 | -1.65200 | 1.63000  |
| H | -4.67200 | -0.57300 | 0.44100  |
| H | -4.69500 | -2.31900 | 0.17600  |
| H | -2.09100 | -1.17000 | -2.27500 |
| H | -3.55100 | -2.15300 | -2.08100 |
| H | -3.64800 | -0.40000 | -1.90800 |

|   |          |          |          |
|---|----------|----------|----------|
| H | -2.70200 | -3.60300 | -0.26600 |
| H | -1.11800 | -2.87400 | -0.55800 |
| H | -1.78000 | -2.92700 | 1.08700  |
| H | 2.44900  | 1.07700  | -1.57000 |
| H | 3.59800  | -1.20100 | 1.88500  |
| H | 6.52300  | -0.18800 | -1.08000 |
| C | 1.25500  | 0.40000  | 2.12700  |
| H | 1.91100  | -0.17900 | 2.78600  |
| H | 1.54700  | 1.45100  | 2.24000  |
| H | 0.22600  | 0.28300  | 2.46700  |

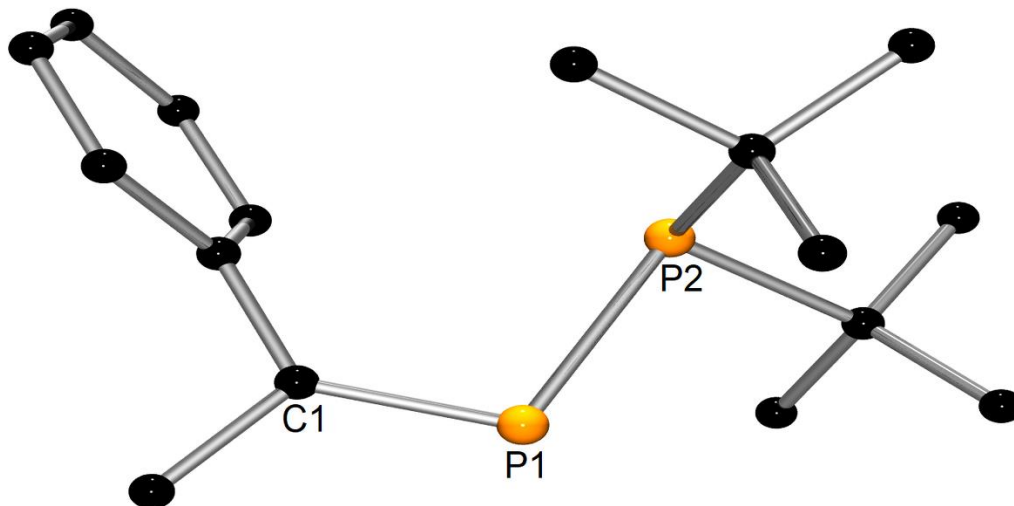

**Figure S36.** Optimized geometry for *E*-isomer of (Ph)MeC=P-*t*Bu<sub>2</sub> (**9**) (hydrogen atoms have been omitted for clarity). Important bond lengths (Å), bond angles (deg.): P1-P2 2.229, C1-P1 1.687; C1-P1-P2 104.64.

Below are presented xyz coordinates for optimized geometry for *E*-isomer of **9**:

|   |          |          |          |
|---|----------|----------|----------|
| C | -3.07700 | -0.40800 | -2.10300 |
| C | -2.26600 | -0.95400 | -1.11400 |
| C | -2.30300 | -0.45700 | 0.19400  |
| C | -3.17900 | 0.59500  | 0.48700  |
| C | -3.97800 | 1.15300  | -0.50600 |
| C | -3.93200 | 0.65100  | -1.80500 |
| H | -3.03500 | -0.80800 | -3.11100 |
| H | -4.64000 | 1.97900  | -0.26300 |
| C | -1.46300 | -1.05300 | 1.26600  |
| P | 0.21900  | -1.08600 | 1.38700  |
| P | 0.93400  | 0.05700  | -0.38800 |
| C | 1.34700  | 1.73200  | 0.43600  |
| C | -0.00900 | 2.45700  | 0.51700  |
| C | 1.95600  | 1.68900  | 1.84500  |
| C | 2.27400  | 2.53200  | -0.49100 |
| H | -0.48000 | 2.55100  | -0.46600 |
| H | -0.70800 | 1.92700  | 1.17200  |
| H | 0.13800  | 3.46300  | 0.93000  |
| H | 2.92000  | 1.17800  | 1.87200  |
| H | 2.11400  | 2.71600  | 2.20000  |
| H | 1.29200  | 1.19500  | 2.56100  |
| H | 2.32700  | 3.57200  | -0.14300 |
| H | 3.29400  | 2.13600  | -0.48600 |
| H | 1.91000  | 2.54300  | -1.52300 |
| C | 2.53300  | -0.91500 | -0.76000 |
| C | 3.10200  | -0.39100 | -2.09100 |
| C | 3.62900  | -0.89000 | 0.31200  |
| C | 2.09200  | -2.37400 | -0.99200 |

|   |          |          |          |
|---|----------|----------|----------|
| H | 2.34600  | -0.41700 | -2.88300 |
| H | 3.47400  | 0.63300  | -2.01300 |
| H | 3.94200  | -1.02400 | -2.40300 |
| H | 3.25400  | -1.20800 | 1.28900  |
| H | 4.43800  | -1.57400 | 0.02500  |
| H | 4.06900  | 0.10600  | 0.41800  |
| H | 2.93900  | -2.95000 | -1.38500 |
| H | 1.76300  | -2.86000 | -0.06900 |
| H | 1.27800  | -2.43700 | -1.72300 |
| H | -1.59200 | -1.77100 | -1.35100 |
| H | -3.21800 | 0.99800  | 1.49600  |
| H | -4.55900 | 1.08100  | -2.57900 |
| C | -2.25000 | -1.70100 | 2.38200  |
| H | -1.60000 | -2.13400 | 3.14600  |
| H | -2.90800 | -0.96700 | 2.86300  |
| H | -2.89800 | -2.48600 | 1.97500  |

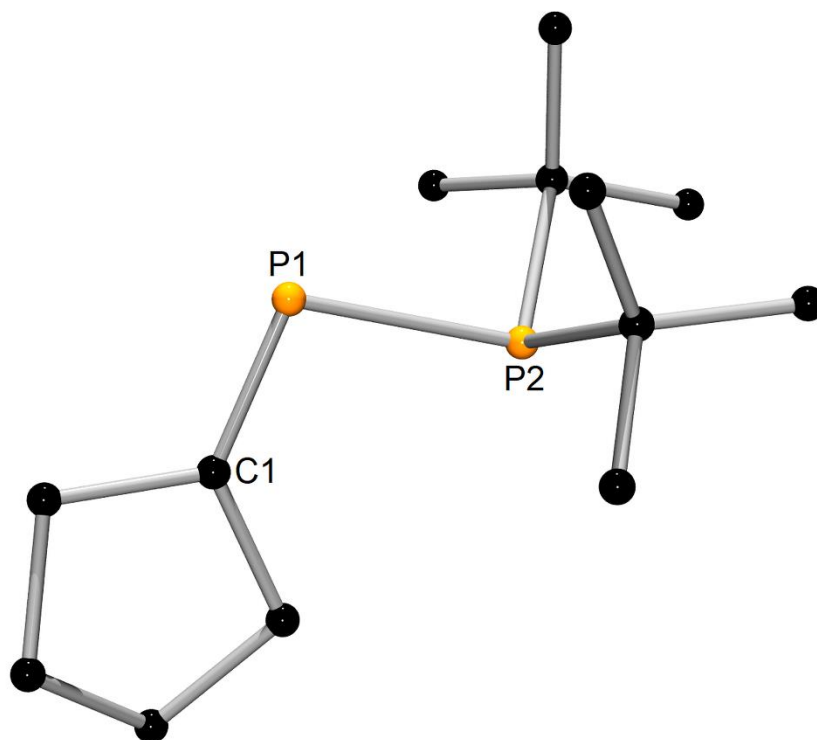

**Figure S37.** Optimized geometry of  $(\text{CH}_2)_4\text{C}=\text{P}-\text{P}t\text{Bu}_2$  (**10a**) (hydrogen atoms have been omitted for clarity). Important bond lengths ( $\text{\AA}$ ), bond angles (deg.): P1-P2 2.226, C1-P1 1.683; C1-P1-P2 102.00.

Below are presented xyz coordinates for optimized geometry for **10a**:

|   |          |          |          |
|---|----------|----------|----------|
| P | -0.77032 | -0.04353 | -0.51760 |
| P | 0.68785  | -0.52530 | 1.09427  |
| C | -2.12253 | -1.34119 | -0.17030 |
| C | -3.12946 | -1.29719 | -1.33456 |
| C | -2.87160 | -1.21701 | 1.16152  |
| H | -2.62632 | -1.42111 | -2.29877 |
| H | -3.85263 | -2.11503 | -1.22181 |
| H | -3.69418 | -0.36284 | -1.36602 |
| H | -2.18704 | -1.18661 | 2.01517  |
| H | -3.50140 | -0.32337 | 1.19076  |
| H | -3.53181 | -2.08408 | 1.29322  |
| C | -1.35502 | 1.68853  | 0.04010  |
| C | -2.65957 | 2.04473  | -0.68795 |
| C | -0.24713 | 2.63946  | -0.45144 |
| H | -3.51325 | 1.49257  | -0.28461 |
| H | -2.87094 | 3.11321  | -0.55504 |
| H | -2.59522 | 1.84670  | -1.76331 |
| H | 0.70644  | 2.43273  | 0.04734  |
| H | -0.09671 | 2.55892  | -1.53290 |
| H | -0.52186 | 3.67616  | -0.22008 |
| C | -1.41747 | -2.70998 | -0.22201 |
| H | -0.81609 | -2.82107 | -1.13125 |
| H | -0.76333 | -2.86974 | 0.64064  |
| H | -2.17197 | -3.50623 | -0.21896 |
| C | -1.54104 | 1.91094  | 1.54848  |



|   |          |          |          |
|---|----------|----------|----------|
| H | -1.84529 | 2.95102  | 1.72450  |
| H | -2.30966 | 1.26530  | 1.97630  |
| H | -0.61261 | 1.74146  | 2.10187  |
| C | 2.16090  | -0.32649 | 0.30443  |
| C | 2.49111  | 0.09990  | -1.11463 |
| C | 3.47829  | -0.57630 | 1.02917  |
| C | 4.00045  | -0.14411 | -1.27146 |
| H | 2.27181  | 1.17031  | -1.22144 |
| H | 1.87009  | -0.41151 | -1.85436 |
| C | 4.54542  | 0.08205  | 0.14311  |
| H | 3.65271  | -1.66056 | 1.06574  |
| H | 3.47123  | -0.21883 | 2.06204  |
| H | 4.18326  | -1.18124 | -1.57750 |
| H | 4.45633  | 0.50780  | -2.02150 |
| H | 5.54293  | -0.33828 | 0.29740  |
| H | 4.59847  | 1.15681  | 0.35555  |

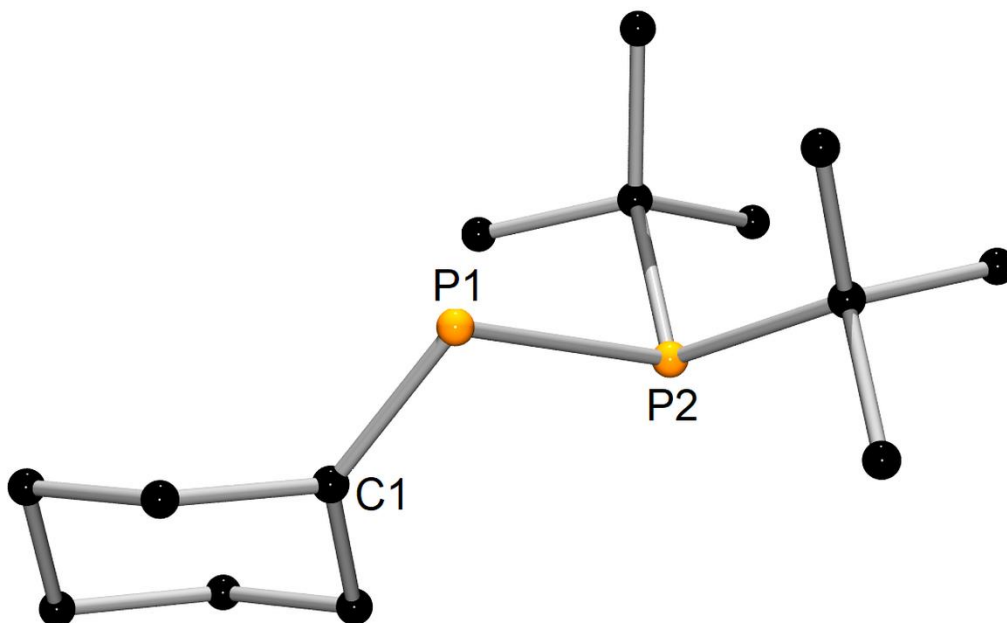

**Figure S38.** Optimized geometry of  $(\text{CH}_2)_5\text{C}=\text{P}-\text{P}t\text{Bu}_2$  (**11a**) (hydrogen atoms have been omitted for clarity). Important bond lengths ( $\text{\AA}$ ), bond angles (deg.): P1-P2 2.228, C1-P1 1.687; C1-P1-P2 104.12.

Below are presented xyz coordinates for optimized geometry for **11a**:

|   |          |          |          |
|---|----------|----------|----------|
| P | 1.04648  | 0.01363  | -0.55093 |
| P | -0.41358 | -0.90958 | 0.85661  |
| C | 1.35484  | 1.72085  | 0.24662  |
| C | 2.23853  | 2.53991  | -0.71227 |
| C | 1.97911  | 1.71840  | 1.64646  |
| H | 1.80382  | 2.58032  | -1.71611 |
| H | 2.32455  | 3.56828  | -0.33851 |
| H | 3.24985  | 2.13749  | -0.79811 |
| H | 1.40958  | 1.09965  | 2.34724  |
| H | 3.01159  | 1.35855  | 1.62834  |
| H | 1.99855  | 2.74223  | 2.04223  |
| C | 2.53323  | -1.14422 | -0.24531 |
| C | 3.80859  | -0.49577 | -0.80407 |
| C | 2.21242  | -2.39214 | -1.09089 |
| H | 4.16920  | 0.31127  | -0.15968 |
| H | 4.60484  | -1.24864 | -0.85859 |
| H | 3.65686  | -0.09466 | -1.81192 |
| H | 1.29438  | -2.88591 | -0.75305 |
| H | 2.09244  | -2.14024 | -2.14929 |
| H | 3.03083  | -3.11738 | -1.00086 |
| C | -1.88475 | -0.82680 | 0.03604  |
| C | -2.22055 | -0.22120 | -1.30081 |
| C | -3.10307 | -1.37393 | 0.74770  |
| C | -3.28748 | 0.87847  | -1.14410 |
| H | -2.63439 | -1.01768 | -1.93784 |
| H | -1.33073 | 0.16693  | -1.80017 |
| C | -4.17424 | -0.28140 | 0.91434  |

|   |          |          |          |
|---|----------|----------|----------|
| H | -3.52208 | -2.18824 | 0.13754  |
| H | -2.83523 | -1.79981 | 1.71968  |
| C | -4.53479 | 0.35393  | -0.42976 |
| H | -3.54721 | 1.27355  | -2.13219 |
| H | -2.85995 | 1.70933  | -0.56876 |
| H | -5.06374 | -0.71016 | 1.38857  |
| H | -3.78744 | 0.48949  | 1.59349  |
| H | -5.25595 | 1.16549  | -0.28320 |
| H | -5.02651 | -0.39653 | -1.06428 |
| C | -0.01762 | 2.41569  | 0.31008  |
| H | -0.51737 | 2.40674  | -0.66510 |
| H | -0.68483 | 1.94680  | 1.03919  |
| H | 0.11967  | 3.46301  | 0.60563  |
| C | 2.79351  | -1.59407 | 1.20090  |
| H | 3.66462  | -2.26193 | 1.21670  |
| H | 3.00743  | -0.75707 | 1.86786  |
| H | 1.94746  | -2.14806 | 1.61649  |

## PART D. REFERENCES

1. Sheldrick, G. A short history of SHELX. *Acta Crystallogr. A* **2008**, 64 (1), 112-122.
2. Farrugia, L. WinGX and ORTEP for Windows: an update. *J. Appl. Cryst.* **2012**, 45 (4), 849-854.
3. Chai, J.-D.; Head-Gordon, M. Long-range corrected hybrid density functionals with damped atom-atom dispersion corrections. *Phys. Chem. Chem. Phys.* **2008**, 10 (44), 6615-6620.
4. Grimme, S. Density functional theory with London dispersion corrections. *Wiley Interdiscip. Rev. Comput. Mol. Sci.* **2011**, 1 (2), 211-228.
5. Wolinski, K.; Hinton, J. F.; Pulay, P. Efficient implementation of the gauge-independent atomic orbital method for NMR chemical shift calculations. *J. Am. Chem. Soc.* **1990**, 112 (23), 8251-8260.
6. Barone, V.; Cossi, M. Quantum Calculation of Molecular Energies and Energy Gradients in Solution by a Conductor Solvent Model. *J. Phys. Chem. A* **1998**, 102 (11), 1995-2001 DOI: 10.1021/jp9716997.
7. Frisch, M. J.; Trucks, G. W.; Schlegel, H. B.; Scuseria, G. E.; Robb, M. A.; Cheeseman, J. R.; Scalmani, G.; Barone, V.; Petersson, G. A.; Nakatsuji, H.; Li, X.; Caricato, M.; Marenich, A. V.; Bloino, J.; Janesko, B. G.; Gomperts, R.; Mennucci, B.; Hratchian, H. P.; Ortiz, J. V.; Izmaylov, A. F.; Sonnenberg, J. L.; Williams, J.; Ding, F.; Lipparini, F.; Egidi, F.; Goings, J.; Peng, B.; Petrone, A.; Henderson, T.; Ranasinghe, D.; Zakrzewski, V. G.; Gao, J.; Rega, N.; Zheng, G.; Liang, W.; Hada, M.; Ehara, M.; Toyota, K.; Fukuda, R.; Hasegawa, J.; Ishida, M.; Nakajima, T.; Honda, Y.; Kitao, O.; Nakai, H.; Vreven, T.; Throssell, K.; Montgomery Jr., J. A.; Peralta, J. E.; Ogliaro, F.; Bearpark, M. J.; Heyd, J. J.; Brothers, E. N.; Kudin, K. N.; Staroverov, V. N.; Keith, T. A.; Kobayashi, R.; Normand, J.; Raghavachari, K.; Rendell, A. P.; Burant, J. C.; Iyengar, S. S.; Tomasi, J.; Cossi, M.; Millam, J. M.; Klene, M.; Adamo, C.; Cammi, R.; Ochterski, J. W.; Martin, R. L.; Morokuma, K.; Farkas, O.; Foresman, J. B.; Fox, D. J. *Gaussian 16 Rev. B.01*, Wallingford, CT, 2016.
